# Supplementary material for: Multiscale partial charge estimation on graphene for neutral, doped and charged flakes
Source: Royal Society of Chemistry journal article supplement (doi:10.1039/c8cp02799d), 2018-01-01
Supplement: c8cp02799d1.pdf [file c8cp02799d1.pdf]

## List of Figures

|    |                                                                       |    |
|----|-----------------------------------------------------------------------|----|
| 1  | Type I structure as a reference to data in the tables 1. . . . .      | 2  |
| 2  | Type I structure as a reference to data in the tables 2. . . . .      | 4  |
| 3  | Type I structure as a reference to data in the tables 3. . . . .      | 6  |
| 4  | Type I structure as a reference to data in the tables 4. . . . .      | 8  |
| 5  | Type I structure as a reference to data in the tables 5. . . . .      | 10 |
| 6  | Type I structure as a reference to data in the tables 6. . . . .      | 12 |
| 7  | Type I structure as a reference to data in the tables 7. . . . .      | 14 |
| 8  | Type I structure as a reference to data in the tables 8. . . . .      | 16 |
| 9  | Type I structure as a reference to data in the tables 9. . . . .      | 18 |
| 10 | Type I structure as a reference to data in the tables 10. . . . .     | 20 |
| 11 | Type I structure as a reference to data in the tables 11. . . . .     | 22 |
| 12 | Type I structure as a reference to data in the tables 12. . . . .     | 24 |
| 13 | Type I structure as a reference to data in the tables 13. . . . .     | 26 |
| 14 | Type I structure as a reference to data in the tables 14. . . . .     | 28 |
| 15 | Type I structure as a reference to data in the tables 15. . . . .     | 30 |
| 16 | Type I structure as a reference to data in the tables 16. . . . .     | 32 |
| 17 | Type I structure as a reference to data in the tables 17. . . . .     | 34 |
| 18 | Type I structure as a reference to data in the tables 18. . . . .     | 36 |
| 19 | Type II structure as a reference to data in the tables 19-20. . . . . | 38 |

## List of Tables

|    |                                                                                                                         |    |
|----|-------------------------------------------------------------------------------------------------------------------------|----|
| 1  | Partial charges for C-flake of type I system with the total charge -1e for 6-31+G(2df, p) basis set . . . . .           | 3  |
| 2  | Partial charges for C-flake of type I system with the total charge 0e for 6-31+G(2df, p) basis set . . . . .            | 5  |
| 3  | Partial charges for C-flake of type I system with the total charge +1e for 6-31+G(2df, p) basis set . . . . .           | 7  |
| 4  | Partial charges for B-doped type I system with the total charge -1e for 6-31+G(2df, p) basis set . . . . .              | 9  |
| 5  | Partial charges for B-doped type I system with the total charge 0e for 6-31+G(2df, p) basis set . . . . .               | 11 |
| 6  | Partial charges for B-doped type I system with the total charge +1e for 6-31+G(2df, p) basis set . . . . .              | 13 |
| 7  | Partial charges for N-doped type I system with the total charge -1e for 6-31+G(2df, p) basis set . . . . .              | 15 |
| 8  | Partial charges for N-doped type I system with the total charge 0e for 6-31+G(2df, p) basis set . . . . .               | 17 |
| 9  | Partial charges for N-doped type I system with the total charge +1e for 6-31+G(2df, p) basis set . . . . .              | 19 |
| 10 | Partial charges for C-flake of type I system with the total charge -1e for Def2TZVP basis set . . . . .                 | 21 |
| 11 | Partial charges for C-flake of type I system with the total charge 0e for Def2TZVP basis set . . . . .                  | 23 |
| 12 | Partial charges for C-flake type I system with the total charge +1e for Def2TZVP basis set . . . . .                    | 25 |
| 13 | Partial charges for B-doped type I system with the total charge -1e for Def2TZVP basis set . . . . .                    | 27 |
| 14 | Partial charges for B-doped type I system with the total charge 0e for Def2TZVP basis set . . . . .                     | 29 |
| 15 | Partial charges for B-doped type I system with the total charge +1e for Def2TZVP basis set . . . . .                    | 31 |
| 16 | Partial charges for N-doped type I system with the total charge -1e for Def2TZVP basis set . . . . .                    | 33 |
| 17 | Partial charges for N-doped type I system with the total charge 0e for Def2TZVP basis set . . . . .                     | 35 |
| 18 | Partial charges for N-doped type I system with the total charge +1e for Def2TZVP basis set . . . . .                    | 37 |
| 19 | Partial charges of type II system for Def2TZVP basis set – MBIS, ACKS2; RESP-A1 model on the B3LYP – RESP fitting . . . | 38 |
| 20 | Partial charges of type II system for 6-31+G(2df, p) basis set – MBIS, ACKS2; RESP-A1 model on the B3LYP – RESP fitting | 40 |

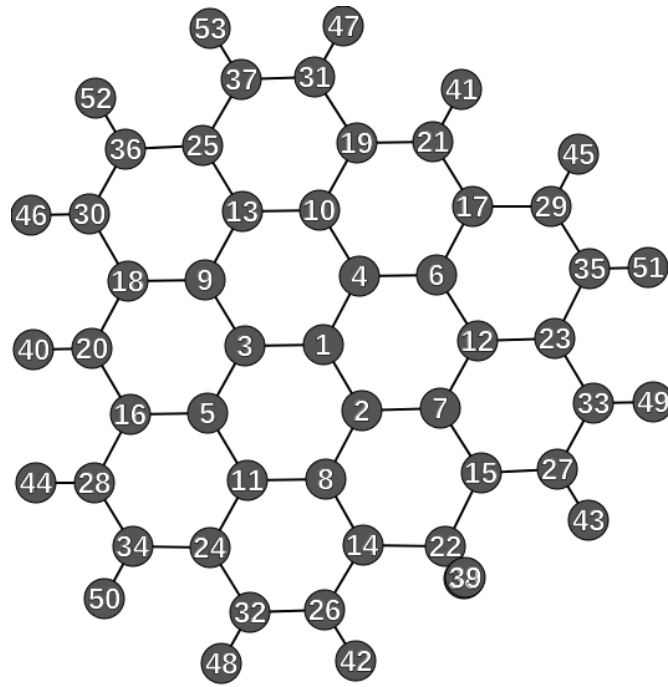

**Figure 1** Type I structure as a reference to data in the tables 1.

**Table 1** Partial charges for C-flake of type I system with the total charge -1e for 6-31+G(2df, p) basis set

| Index | Atom | Distance | RESP      | MBIS      |
|-------|------|----------|-----------|-----------|
| 1     | C    | 0        | -0.005659 | -0.02664  |
| 2     | C    | 1.41     | -0.007322 | -0.08248  |
| 3     | C    | 1.425    | -0.03109  | -0.002956 |
| 4     | C    | 1.425    | -0.0227   | -0.005166 |
| 5     | C    | 2.463    | -0.03727  | -0.01254  |
| 6     | C    | 2.463    | -0.04991  | -0.01484  |
| 7     | C    | 2.467    | -0.1015   | 0.01214   |
| 8     | C    | 2.467    | -0.09952  | 0.008184  |
| 9     | C    | 2.468    | -0.03258  | -0.01359  |
| 10    | C    | 2.468    | -0.04708  | -0.004081 |
| 11    | C    | 2.846    | 0.06367   | 0.01119   |
| 12    | C    | 2.846    | 0.07197   | 0.009711  |
| 13    | C    | 2.856    | 0.02688   | -0.008475 |
| 14    | C    | 3.758    | 0.1177    | 0.03482   |
| 15    | C    | 3.758    | 0.118     | 0.03527   |
| 16    | C    | 3.76     | 0.1869    | 0.09588   |
| 17    | C    | 3.76     | 0.2013    | 0.101     |
| 18    | C    | 3.772    | 0.2046    | 0.1347    |
| 19    | C    | 3.772    | 0.225     | 0.1276    |
| 20    | C    | 4.245    | -0.4235   | -0.3552   |
| 21    | C    | 4.245    | -0.4396   | -0.3523   |
| 22    | C    | 4.35     | -0.08859  | -0.248    |
| 23    | C    | 4.265    | 0.07891   | 0.08825   |
| 24    | C    | 4.265    | 0.08679   | 0.08917   |
| 25    | C    | 4.279    | 0.07832   | 0.03395   |
| 26    | C    | 4.889    | -0.2314   | -0.2201   |
| 27    | C    | 4.889    | -0.2368   | -0.2214   |
| 28    | C    | 4.912    | -0.2253   | -0.2125   |
| 29    | C    | 4.912    | -0.2323   | -0.2146   |
| 30    | C    | 4.926    | -0.2558   | -0.2637   |
| 31    | C    | 4.926    | -0.2621   | -0.2616   |
| 32    | C    | 5.104    | -0.2319   | -0.2541   |
| 33    | C    | 5.104    | -0.2244   | -0.2506   |
| 34    | C    | 5.106    | -0.2195   | -0.2291   |
| 35    | C    | 5.106    | -0.2149   | -0.2304   |
| 36    | C    | 5.114    | -0.2072   | -0.188    |
| 37    | C    | 5.114    | -0.2074   | -0.1964   |
| 38    | H    | 5.097    | 0.0218    | 0.107     |
| 39    | H    | 5.097    | 0.0218    | 0.1061    |
| 40    | H    | 5.332    | 0.1324    | 0.1379    |
| 41    | H    | 5.332    | 0.1374    | 0.1364    |
| 42    | H    | 5.852    | 0.1111    | 0.1298    |
| 43    | H    | 5.852    | 0.1126    | 0.1302    |
| 44    | H    | 5.873    | 0.1164    | 0.1312    |
| 45    | H    | 5.873    | 0.1168    | 0.1325    |
| 46    | H    | 5.888    | 0.1179    | 0.1323    |
| 47    | H    | 5.888    | 0.1177    | 0.1327    |
| 48    | H    | 6.164    | 0.1145    | 0.1313    |
| 49    | H    | 6.164    | 0.1134    | 0.1299    |
| 50    | H    | 6.164    | 0.1099    | 0.1325    |
| 51    | H    | 6.164    | 0.1093    | 0.1329    |
| 52    | H    | 6.173    | 0.1119    | 0.1264    |
| 53    | H    | 6.173    | 0.1105    | 0.1292    |

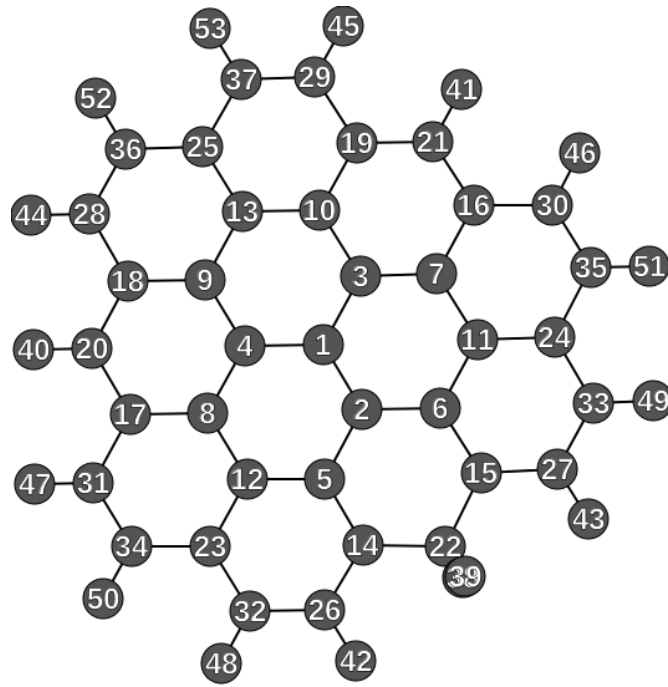

**Figure 2** Type I structure as a reference to data in the tables 2.

**Table 2** Partial charges for C-flake of type I system with the total charge 0e for 6-31+G(2df, p) basis set

| Index | Atom | Distance | RESP      | MBIS      |
|-------|------|----------|-----------|-----------|
| 1     | C    | 0        | -0.007898 | -0.01317  |
| 2     | C    | 1.387    | 0.0899    | 0.002553  |
| 3     | C    | 1.438    | 0.002424  | 0.007957  |
| 4     | C    | 1.438    | -0.00221  | 5.739e-05 |
| 5     | C    | 2.452    | -0.1488   | -0.01545  |
| 6     | C    | 2.452    | -0.1561   | -0.02231  |
| 7     | C    | 2.462    | -0.06853  | -0.01008  |
| 8     | C    | 2.462    | -0.06494  | 0.001812  |
| 9     | C    | 2.474    | -0.02799  | -0.003169 |
| 10    | C    | 2.474    | -0.03915  | -0.005532 |
| 11    | C    | 2.835    | 0.09512   | 0.01852   |
| 12    | C    | 2.835    | 0.08859   | 0.006437  |
| 13    | C    | 2.86     | 0.02047   | 0.007775  |
| 14    | C    | 3.737    | 0.1877    | 0.07927   |
| 15    | C    | 3.737    | 0.1962    | 0.08385   |
| 16    | C    | 3.769    | 0.2253    | 0.09798   |
| 17    | C    | 3.769    | 0.2235    | 0.08372   |
| 18    | C    | 3.77     | 0.1891    | 0.08587   |
| 19    | C    | 3.77     | 0.205     | 0.09558   |
| 20    | C    | 4.249    | -0.3725   | -0.2524   |
| 21    | C    | 4.249    | -0.3803   | -0.263    |
| 22    | C    | 4.316    | -0.1466   | -0.288    |
| 23    | C    | 4.253    | 0.08338   | 0.07718   |
| 24    | C    | 4.253    | 0.078     | 0.071     |
| 25    | C    | 4.262    | 0.1428    | 0.07452   |
| 26    | C    | 4.864    | -0.2395   | -0.2119   |
| 27    | C    | 4.864    | -0.2485   | -0.2168   |
| 28    | C    | 4.923    | -0.1985   | -0.1884   |
| 29    | C    | 4.923    | -0.2053   | -0.1895   |
| 30    | C    | 4.929    | -0.2199   | -0.1937   |
| 31    | C    | 4.929    | -0.2199   | -0.1883   |
| 32    | C    | 5.076    | -0.1788   | -0.1846   |
| 33    | C    | 5.076    | -0.1714   | -0.178    |
| 34    | C    | 5.11     | -0.1764   | -0.1888   |
| 35    | C    | 5.11     | -0.1763   | -0.19     |
| 36    | C    | 5.111    | -0.2149   | -0.1886   |
| 37    | C    | 5.111    | -0.2135   | -0.1935   |
| 38    | H    | 5.058    | 0.05968   | 0.1437    |
| 39    | H    | 5.058    | 0.05968   | 0.1436    |
| 40    | H    | 5.335    | 0.154     | 0.1492    |
| 41    | H    | 5.335    | 0.1565    | 0.151     |
| 42    | H    | 5.828    | 0.137     | 0.1481    |
| 43    | H    | 5.828    | 0.1386    | 0.1484    |
| 44    | H    | 5.884    | 0.1365    | 0.1471    |
| 45    | H    | 5.884    | 0.1369    | 0.1472    |
| 46    | H    | 5.889    | 0.1372    | 0.1493    |
| 47    | H    | 5.889    | 0.1375    | 0.1482    |
| 48    | H    | 6.137    | 0.1356    | 0.1458    |
| 49    | H    | 6.137    | 0.1339    | 0.1442    |
| 50    | H    | 6.165    | 0.1261    | 0.1478    |
| 51    | H    | 6.165    | 0.127     | 0.1491    |
| 52    | H    | 6.167    | 0.1379    | 0.1472    |
| 53    | H    | 6.167    | 0.1364    | 0.1486    |

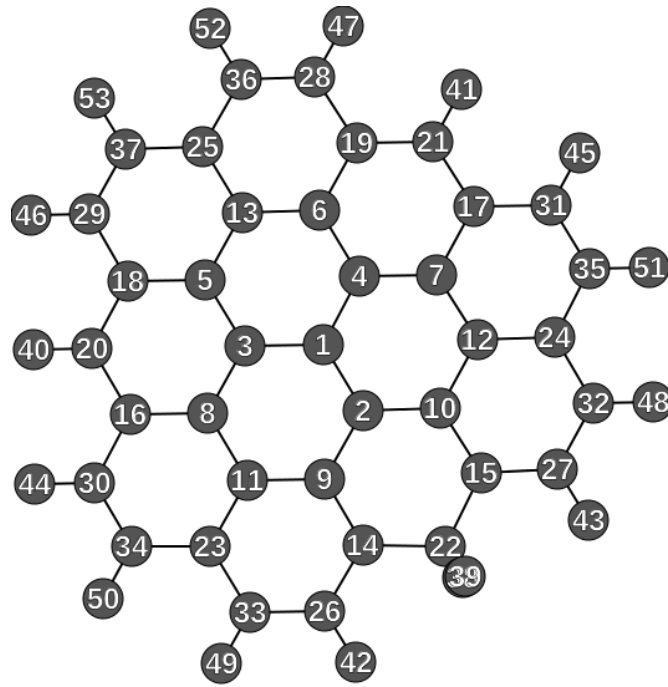

**Figure 3** Type I structure as a reference to data in the tables 3.

**Table 3** Partial charges for C-flake of type I system with the total charge +1e for 6-31+G(2df, p) basis set

| Index | Atom | Distance | RESP      | MBIS       |
|-------|------|----------|-----------|------------|
| 1     | C    | 0        | 0.002145  | -0.002238  |
| 2     | C    | 1.414    | 0.1748    | 0.09644    |
| 3     | C    | 1.424    | -0.0041   | 0.007802   |
| 4     | C    | 1.424    | 0.004048  | 0.009364   |
| 5     | C    | 2.459    | -0.008786 | 0.01506    |
| 6     | C    | 2.459    | -0.02163  | 0.01688    |
| 7     | C    | 2.459    | -0.05252  | 0.005274   |
| 8     | C    | 2.459    | -0.04492  | 0.01138    |
| 9     | C    | 2.463    | -0.1824   | -0.0601    |
| 10    | C    | 2.463    | -0.1847   | -0.05529   |
| 11    | C    | 2.839    | 0.08589   | 0.02       |
| 12    | C    | 2.839    | 0.08747   | 0.01627    |
| 13    | C    | 2.839    | 0.0178    | -0.0001265 |
| 14    | C    | 3.748    | 0.276     | 0.1514     |
| 15    | C    | 3.748    | 0.2791    | 0.1515     |
| 16    | C    | 3.755    | 0.2148    | 0.06923    |
| 17    | C    | 3.755    | 0.2226    | 0.07332    |
| 18    | C    | 3.758    | 0.1614    | 0.03646    |
| 19    | C    | 3.758    | 0.1783    | 0.03681    |
| 20    | C    | 4.234    | -0.2872   | -0.1503    |
| 21    | C    | 4.234    | -0.299    | -0.1524    |
| 22    | C    | 4.318    | -0.2801   | -0.3541    |
| 23    | C    | 4.251    | 0.08431   | 0.06223    |
| 24    | C    | 4.251    | 0.0872    | 0.06699    |
| 25    | C    | 4.259    | 0.195     | 0.1442     |
| 26    | C    | 4.885    | -0.2491   | -0.222     |
| 27    | C    | 4.885    | -0.2526   | -0.2194    |
| 28    | C    | 4.914    | -0.1487   | -0.1158    |
| 29    | C    | 4.914    | -0.1419   | -0.1147    |
| 30    | C    | 4.914    | -0.1969   | -0.1618    |
| 31    | C    | 4.914    | -0.1979   | -0.1605    |
| 32    | C    | 5.084    | -0.1128   | -0.1116    |
| 33    | C    | 5.084    | -0.1129   | -0.1077    |
| 34    | C    | 5.103    | -0.1488   | -0.1533    |
| 35    | C    | 5.103    | -0.1519   | -0.1595    |
| 36    | C    | 5.106    | -0.2124   | -0.2027    |
| 37    | C    | 5.106    | -0.2146   | -0.2035    |
| 38    | H    | 5.065    | 0.1188    | 0.1854     |
| 39    | H    | 5.065    | 0.1188    | 0.1854     |
| 40    | H    | 5.32     | 0.1632    | 0.161      |
| 41    | H    | 5.32     | 0.1665    | 0.1621     |
| 42    | H    | 5.848    | 0.1621    | 0.1717     |
| 43    | H    | 5.848    | 0.163     | 0.1709     |
| 44    | H    | 5.874    | 0.1595    | 0.1643     |
| 45    | H    | 5.874    | 0.1594    | 0.1642     |
| 46    | H    | 5.874    | 0.1545    | 0.1614     |
| 47    | H    | 5.874    | 0.1547    | 0.1624     |
| 48    | H    | 6.143    | 0.1492    | 0.1613     |
| 49    | H    | 6.143    | 0.1492    | 0.1607     |
| 50    | H    | 6.158    | 0.148     | 0.1641     |
| 51    | H    | 6.158    | 0.1491    | 0.1666     |
| 52    | H    | 6.162    | 0.1589    | 0.1704     |
| 53    | H    | 6.162    | 0.1603    | 0.1708     |

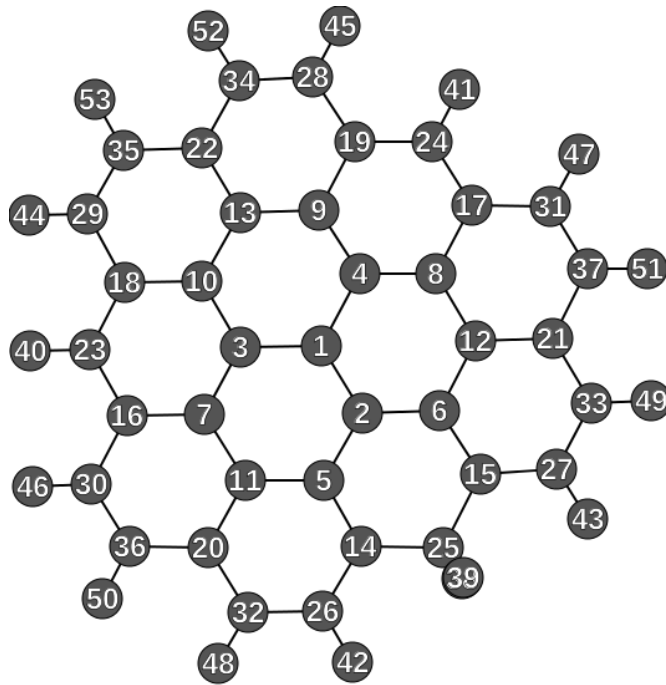

**Figure 4** Type I structure as a reference to data in the tables 4.



**Table 4** Partial charges for B-doped type I system with the total charge -1e for 6-31+G(2df, p) basis set

| Index | Atom | Distance | RESP     | MBIS      |
|-------|------|----------|----------|-----------|
| 1     | B    | 0        | 0.05931  | 0.2663    |
| 2     | C    | 1.463    | -0.1817  | -0.3754   |
| 3     | C    | 1.503    | -0.1383  | -0.2395   |
| 4     | C    | 1.503    | -0.1327  | -0.2444   |
| 5     | C    | 2.488    | -0.01481 | 0.0998    |
| 6     | C    | 2.488    | -0.01909 | 0.09611   |
| 7     | C    | 2.502    | 0.008491 | 0.06045   |
| 8     | C    | 2.502    | 0.002717 | 0.06047   |
| 9     | C    | 2.51     | 0.01692  | 0.05874   |
| 10    | C    | 2.51     | 0.02488  | 0.05165   |
| 11    | C    | 2.852    | -0.02041 | -0.04462  |
| 12    | C    | 2.852    | -0.01818 | -0.04053  |
| 13    | C    | 2.868    | -0.04149 | -0.004974 |
| 14    | C    | 3.783    | 0.1167   | 0.03888   |
| 15    | C    | 3.783    | 0.1244   | 0.04007   |
| 16    | C    | 3.81     | 0.2013   | 0.0904    |
| 17    | C    | 3.81     | 0.2072   | 0.09158   |
| 18    | C    | 3.812    | 0.1764   | 0.08708   |
| 19    | C    | 3.812    | 0.186    | 0.08372   |
| 20    | C    | 4.27     | 0.1181   | 0.08892   |
| 21    | C    | 4.27     | 0.1192   | 0.08653   |
| 22    | C    | 4.272    | 0.1571   | 0.05975   |
| 23    | C    | 4.283    | -0.4029  | -0.2979   |
| 24    | C    | 4.283    | -0.4103  | -0.2995   |
| 25    | C    | 4.353    | -0.05887 | -0.2446   |
| 26    | C    | 4.907    | -0.2376  | -0.2261   |
| 27    | C    | 4.907    | -0.2467  | -0.2236   |
| 28    | C    | 4.958    | -0.2167  | -0.2129   |
| 29    | C    | 4.958    | -0.215   | -0.2215   |
| 30    | C    | 4.963    | -0.2253  | -0.2148   |
| 31    | C    | 4.963    | -0.2272  | -0.2152   |
| 32    | C    | 5.106    | -0.2419  | -0.2502   |
| 33    | C    | 5.107    | -0.2379  | -0.2534   |
| 34    | C    | 5.126    | -0.2436  | -0.2127   |
| 35    | C    | 5.126    | -0.2419  | -0.203    |
| 36    | C    | 5.127    | -0.2     | -0.203    |
| 37    | C    | 5.127    | -0.2019  | -0.2003   |
| 38    | H    | 5.096    | 0.02156  | 0.1134    |
| 39    | H    | 5.096    | 0.02156  | 0.1134    |
| 40    | H    | 5.372    | 0.1322   | 0.1307    |
| 41    | H    | 5.372    | 0.1352   | 0.13      |
| 42    | H    | 5.877    | 0.1087   | 0.1268    |
| 43    | H    | 5.877    | 0.1108   | 0.1267    |
| 44    | H    | 5.927    | 0.1146   | 0.1324    |
| 45    | H    | 5.927    | 0.1138   | 0.1299    |
| 46    | H    | 5.932    | 0.1131   | 0.1301    |
| 47    | H    | 5.932    | 0.1129   | 0.1307    |
| 48    | H    | 6.167    | 0.1164   | 0.1278    |
| 49    | H    | 6.167    | 0.1159   | 0.1282    |
| 50    | H    | 6.182    | 0.1035   | 0.1301    |
| 51    | H    | 6.182    | 0.1044   | 0.1289    |
| 52    | H    | 6.182    | 0.1155   | 0.1292    |
| 53    | H    | 6.182    | 0.1157   | 0.1262    |

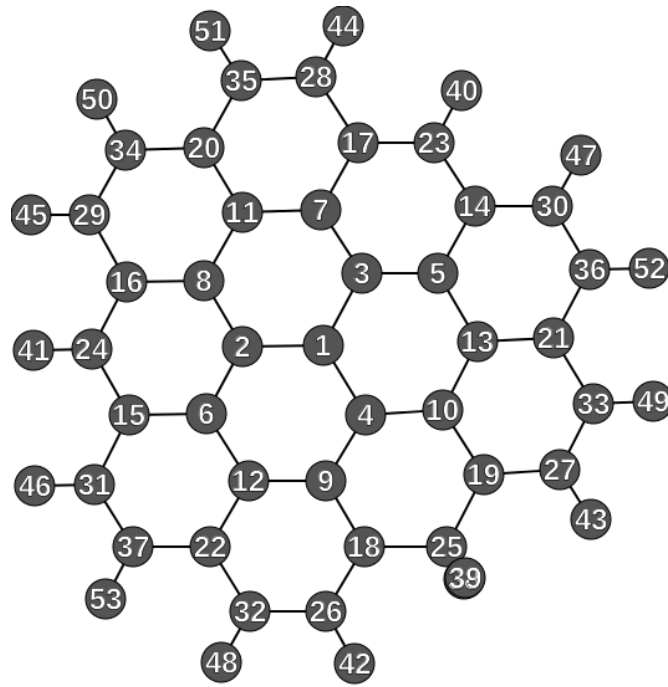

**Figure 5** Type I structure as a reference to data in the tables 5.

**Table 5** Partial charges for B-doped type I system with the total charge 0e for 6-31+G(2df, p) basis set

| Index | Atom | Distance | RESP      | MBIS     |
|-------|------|----------|-----------|----------|
| 1     | B    | 0        | 0.2052    | 0.4245   |
| 2     | C    | 1.499    | -0.2236   | -0.3228  |
| 3     | C    | 1.499    | -0.2197   | -0.3153  |
| 4     | C    | 1.5      | -0.02612  | -0.2155  |
| 5     | C    | 2.496    | 0.03476   | 0.08837  |
| 6     | C    | 2.496    | 0.04392   | 0.09729  |
| 7     | C    | 2.498    | 0.08036   | 0.09671  |
| 8     | C    | 2.498    | 0.08622   | 0.09621  |
| 9     | C    | 2.513    | -0.09952  | 0.02018  |
| 10    | C    | 2.513    | -0.09871  | 0.02371  |
| 11    | C    | 2.855    | -0.1048   | -0.05066 |
| 12    | C    | 2.856    | -0.01322  | -0.01795 |
| 13    | C    | 2.856    | -0.007125 | -0.01912 |
| 14    | C    | 3.799    | 0.2       | 0.06088  |
| 15    | C    | 3.799    | 0.1893    | 0.05014  |
| 16    | C    | 3.8      | 0.1538    | 0.04952  |
| 17    | C    | 3.8      | 0.1629    | 0.0519   |
| 18    | C    | 3.802    | 0.2268    | 0.1076   |
| 19    | C    | 3.802    | 0.2224    | 0.1095   |
| 20    | C    | 4.254    | 0.2217    | 0.1104   |
| 21    | C    | 4.262    | 0.1351    | 0.07898  |
| 22    | C    | 4.262    | 0.1409    | 0.07352  |
| 23    | C    | 4.267    | -0.3334   | -0.2044  |
| 24    | C    | 4.267    | -0.3245   | -0.1966  |
| 25    | C    | 4.368    | -0.2096   | -0.3066  |
| 26    | C    | 4.931    | -0.2579   | -0.2291  |
| 27    | C    | 4.931    | -0.2579   | -0.2326  |
| 28    | C    | 4.948    | -0.1819   | -0.1744  |
| 29    | C    | 4.948    | -0.1801   | -0.1711  |
| 30    | C    | 4.953    | -0.2101   | -0.1774  |
| 31    | C    | 4.954    | -0.2043   | -0.1754  |
| 32    | C    | 5.108    | -0.1716   | -0.1554  |
| 33    | C    | 5.108    | -0.1682   | -0.156   |
| 34    | C    | 5.113    | -0.2412   | -0.2046  |
| 35    | C    | 5.113    | -0.2428   | -0.2023  |
| 36    | C    | 5.122    | -0.2026   | -0.1991  |
| 37    | C    | 5.122    | -0.2061   | -0.1967  |
| 38    | H    | 5.113    | 0.08233   | 0.1536   |
| 39    | H    | 5.113    | 0.08232   | 0.1529   |
| 40    | H    | 5.355    | 0.1477    | 0.1437   |
| 41    | H    | 5.355    | 0.145     | 0.1411   |
| 42    | H    | 5.903    | 0.1393    | 0.1505   |
| 43    | H    | 5.903    | 0.1399    | 0.1514   |
| 44    | H    | 5.917    | 0.1343    | 0.1466   |
| 45    | H    | 5.917    | 0.1347    | 0.1461   |
| 46    | H    | 5.92     | 0.1366    | 0.1471   |
| 47    | H    | 5.92     | 0.1372    | 0.1465   |
| 48    | H    | 6.165    | 0.1336    | 0.1421   |
| 49    | H    | 6.165    | 0.1333    | 0.1425   |
| 50    | H    | 6.167    | 0.1381    | 0.1467   |
| 51    | H    | 6.167    | 0.1381    | 0.1467   |
| 52    | H    | 6.176    | 0.1293    | 0.1471   |
| 53    | H    | 6.176    | 0.1299    | 0.147    |

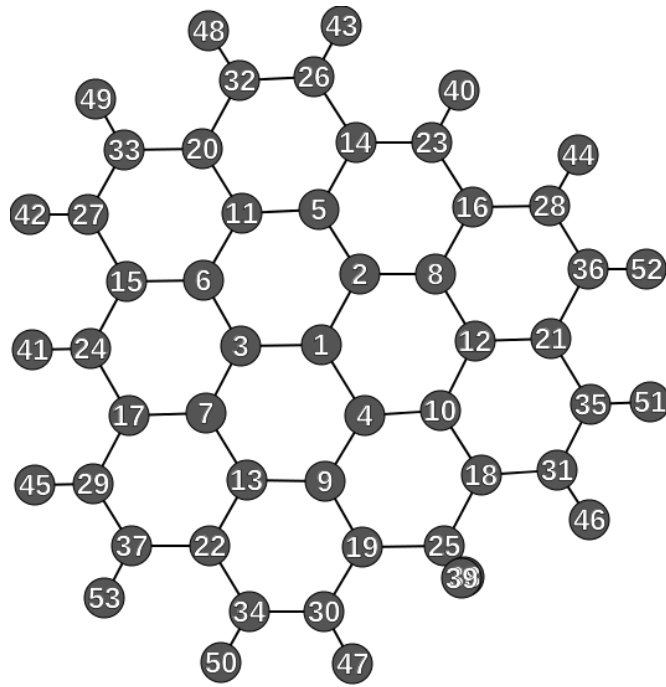

**Figure 6** Type I structure as a reference to data in the tables 6.

**Table 6** Partial charges for B-doped type I system with the total charge +1e for 6-31+G(2df, p) basis set

| Index | Atom | Distance | RESP     | MBIS      |
|-------|------|----------|----------|-----------|
| 1     | B    | 0        | 0.2261   | 0.4441    |
| 2     | C    | 1.486    | -0.2527  | -0.3547   |
| 3     | C    | 1.486    | -0.2482  | -0.3566   |
| 4     | C    | 1.536    | 0.1215   | -0.04159  |
| 5     | C    | 2.481    | 0.1316   | 0.1358    |
| 6     | C    | 2.481    | 0.1248   | 0.1421    |
| 7     | C    | 2.492    | 0.03995  | 0.1033    |
| 8     | C    | 2.492    | 0.04863  | 0.1083    |
| 9     | C    | 2.526    | -0.1585  | -0.0415   |
| 10    | C    | 2.526    | -0.1595  | -0.03821  |
| 11    | C    | 2.837    | -0.152   | -0.09074  |
| 12    | C    | 2.857    | 0.007496 | -0.004253 |
| 13    | C    | 2.857    | 0.01192  | 0.006443  |
| 14    | C    | 3.786    | 0.133    | 0.01688   |
| 15    | C    | 3.786    | 0.1434   | 0.01454   |
| 16    | C    | 3.787    | 0.193    | 0.03418   |
| 17    | C    | 3.787    | 0.2032   | 0.03797   |
| 18    | C    | 3.818    | 0.3359   | 0.2058    |
| 19    | C    | 3.818    | 0.3313   | 0.2052    |
| 20    | C    | 4.239    | 0.2921   | 0.173     |
| 21    | C    | 4.256    | 0.1219   | 0.0557    |
| 22    | C    | 4.256    | 0.1194   | 0.05044   |
| 23    | C    | 4.253    | -0.2581  | -0.1149   |
| 24    | C    | 4.253    | -0.2674  | -0.1194   |
| 25    | C    | 4.365    | -0.3536  | -0.3805   |
| 26    | C    | 4.937    | -0.1324  | -0.1163   |
| 27    | C    | 4.937    | -0.136   | -0.1211   |
| 28    | C    | 4.942    | -0.1825  | -0.137    |
| 29    | C    | 4.942    | -0.1871  | -0.1435   |
| 30    | C    | 4.952    | -0.2843  | -0.2645   |
| 31    | C    | 4.952    | -0.2863  | -0.2647   |
| 32    | C    | 5.103    | -0.2473  | -0.2134   |
| 33    | C    | 5.103    | -0.2472  | -0.2045   |
| 34    | C    | 5.108    | -0.07353 | -0.04368  |
| 35    | C    | 5.108    | -0.07401 | -0.04573  |
| 36    | C    | 5.118    | -0.1858  | -0.1831   |
| 37    | C    | 5.118    | -0.1842  | -0.178    |
| 38    | H    | 5.118    | 0.1478   | 0.2046    |
| 39    | H    | 5.118    | 0.1478   | 0.2044    |
| 40    | H    | 5.34     | 0.1572   | 0.1533    |
| 41    | H    | 5.34     | 0.1597   | 0.1546    |
| 42    | H    | 5.906    | 0.1525   | 0.161     |
| 43    | H    | 5.906    | 0.1524   | 0.16      |
| 44    | H    | 5.908    | 0.1577   | 0.1611    |
| 45    | H    | 5.908    | 0.1583   | 0.1625    |
| 46    | H    | 5.926    | 0.1685   | 0.1783    |
| 47    | H    | 5.926    | 0.1686   | 0.1783    |
| 48    | H    | 6.156    | 0.1604   | 0.1679    |
| 49    | H    | 6.156    | 0.1601   | 0.1661    |
| 50    | H    | 6.163    | 0.1471   | 0.1578    |
| 51    | H    | 6.163    | 0.147    | 0.1587    |
| 52    | H    | 6.172    | 0.1501   | 0.1636    |
| 53    | H    | 6.172    | 0.1501   | 0.1629    |

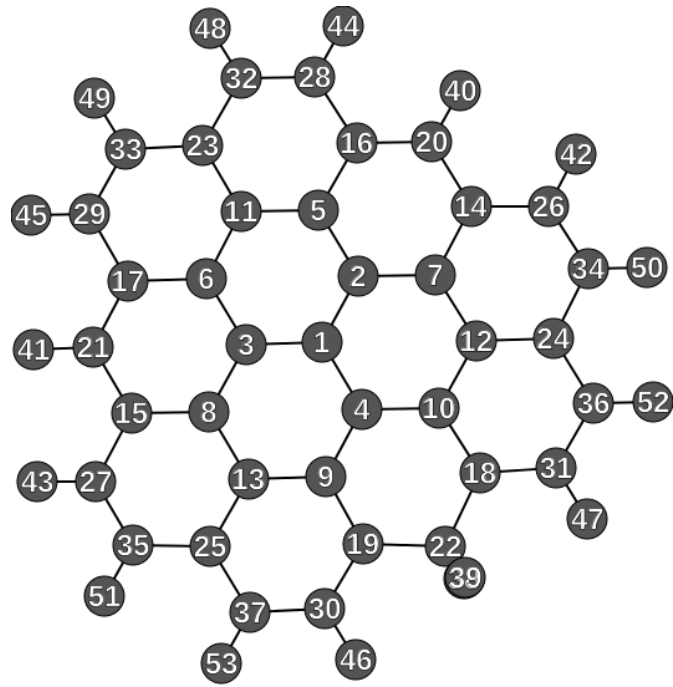

**Figure 7** Type I structure as a reference to data in the tables 7.

**Table 7** Partial charges for N-doped type I system with the total charge -1e for 6-31+G(2df, p) basis set

| Index | Atom | Distance | RESP      | MBIS      |
|-------|------|----------|-----------|-----------|
| 1     | N    | 0        | 0.1403    | -0.09866  |
| 2     | C    | 1.385    | 0.02683   | 0.1983    |
| 3     | C    | 1.385    | 0.02759   | 0.1919    |
| 4     | C    | 1.438    | -0.123    | -0.09038  |
| 5     | C    | 2.43     | -0.1016   | -0.1034   |
| 6     | C    | 2.43     | -0.103    | -0.1041   |
| 7     | C    | 2.436    | -0.06359  | -0.09681  |
| 8     | C    | 2.436    | -0.06763  | -0.09012  |
| 9     | C    | 2.477    | -0.0643   | -0.001328 |
| 10    | C    | 2.477    | -0.06507  | -0.00445  |
| 11    | C    | 2.833    | 0.09953   | 0.0711    |
| 12    | C    | 2.861    | 0.05727   | 0.02262   |
| 13    | C    | 2.861    | 0.05937   | 0.01827   |
| 14    | C    | 3.72     | 0.197     | 0.1368    |
| 15    | C    | 3.72     | 0.2025    | 0.1336    |
| 16    | C    | 3.739    | 0.2406    | 0.1595    |
| 17    | C    | 3.739    | 0.242     | 0.1669    |
| 18    | C    | 3.779    | 0.05077   | 0.001997  |
| 19    | C    | 3.779    | 0.05115   | -0.008817 |
| 20    | C    | 4.218    | -0.4515   | -0.3847   |
| 21    | C    | 4.218    | -0.454    | -0.3873   |
| 22    | C    | 4.393    | -0.02297  | -0.2198   |
| 23    | C    | 4.241    | 0.0362    | -0.01021  |
| 24    | C    | 4.267    | 0.108     | 0.09883   |
| 25    | C    | 4.267    | 0.1052    | 0.107     |
| 26    | C    | 4.882    | -0.2304   | -0.2347   |
| 27    | C    | 4.882    | -0.2344   | -0.2315   |
| 28    | C    | 4.894    | -0.2815   | -0.2722   |
| 29    | C    | 4.894    | -0.2784   | -0.2778   |
| 30    | C    | 4.905    | -0.1987   | -0.1753   |
| 31    | C    | 4.905    | -0.1931   | -0.1786   |
| 32    | C    | 5.08     | -0.1853   | -0.1751   |
| 33    | C    | 5.08     | -0.1898   | -0.17     |
| 34    | C    | 5.09     | -0.2092   | -0.1916   |
| 35    | C    | 5.09     | -0.2077   | -0.1997   |
| 36    | C    | 5.132    | -0.2927   | -0.3394   |
| 37    | C    | 5.132    | -0.2871   | -0.3429   |
| 38    | H    | 5.142    | -0.00296  | 0.08466   |
| 39    | H    | 5.143    | -0.002961 | 0.08455   |
| 40    | H    | 5.304    | 0.1403    | 0.1438    |
| 41    | H    | 5.304    | 0.142     | 0.1442    |
| 42    | H    | 5.835    | 0.1183    | 0.134     |
| 43    | H    | 5.835    | 0.1185    | 0.1342    |
| 44    | H    | 5.853    | 0.1239    | 0.139     |
| 45    | H    | 5.853    | 0.1225    | 0.1399    |
| 46    | H    | 5.866    | 0.1085    | 0.1266    |
| 47    | H    | 5.866    | 0.107     | 0.1259    |
| 48    | H    | 6.139    | 0.1121    | 0.1294    |
| 49    | H    | 6.139    | 0.1125    | 0.1279    |
| 50    | H    | 6.151    | 0.112     | 0.1303    |
| 51    | H    | 6.151    | 0.1119    | 0.1318    |
| 52    | H    | 6.189    | 0.1188    | 0.1371    |
| 53    | H    | 6.189    | 0.1183    | 0.1371    |

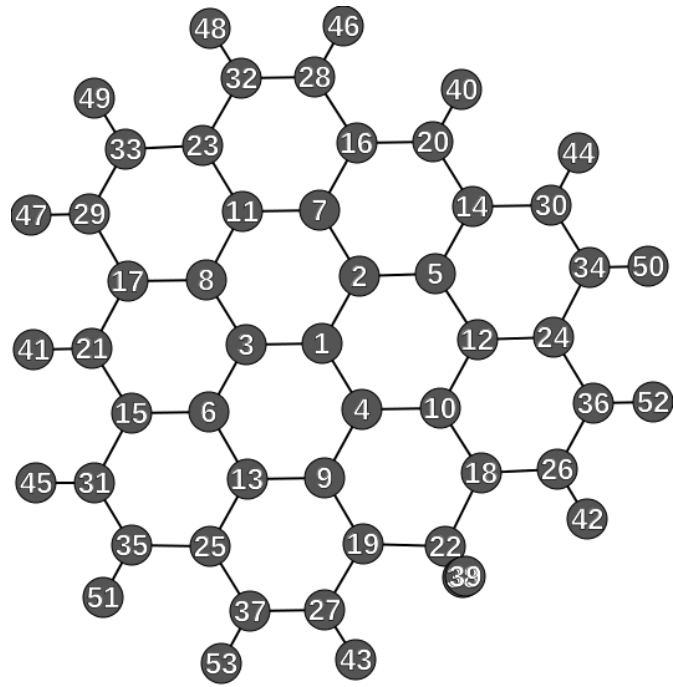

**Figure 8** Type I structure as a reference to data in the tables 8.



**Table 8** Partial charges for N-doped type I system with the total charge 0e for 6-31+G(2df, p) basis set

| Index | Atom | Distance | RESP     | MBIS     |
|-------|------|----------|----------|----------|
| 1     | N    | 0        | 0.1053   | -0.1364  |
| 2     | C    | 1.403    | 0.02977  | 0.1858   |
| 3     | C    | 1.403    | 0.03181  | 0.1923   |
| 4     | C    | 1.41     | 0.06998  | 0.1149   |
| 5     | C    | 2.438    | -0.08569 | -0.09432 |
| 6     | C    | 2.438    | -0.09103 | -0.09196 |
| 7     | C    | 2.439    | -0.07204 | -0.08136 |
| 8     | C    | 2.439    | -0.07558 | -0.08486 |
| 9     | C    | 2.461    | -0.1598  | -0.06543 |
| 10    | C    | 2.461    | -0.1596  | -0.07052 |
| 11    | C    | 2.841    | 0.07115  | 0.05793  |
| 12    | C    | 2.847    | 0.1047   | 0.04439  |
| 13    | C    | 2.847    | 0.1085   | 0.04048  |
| 14    | C    | 3.735    | 0.2224   | 0.1233   |
| 15    | C    | 3.735    | 0.229    | 0.1245   |
| 16    | C    | 3.741    | 0.2189   | 0.1263   |
| 17    | C    | 3.741    | 0.2237   | 0.1281   |
| 18    | C    | 3.75     | 0.1675   | 0.07691  |
| 19    | C    | 3.75     | 0.1672   | 0.07779  |
| 20    | C    | 4.226    | -0.3979  | -0.3017  |
| 21    | C    | 4.226    | -0.4026  | -0.3044  |
| 22    | C    | 4.345    | -0.1384  | -0.2905  |
| 23    | C    | 4.239    | 0.0941   | 0.03061  |
| 24    | C    | 4.253    | 0.07905  | 0.06634  |
| 25    | C    | 4.253    | 0.07501  | 0.06479  |
| 26    | C    | 4.882    | -0.2287  | -0.203   |
| 27    | C    | 4.882    | -0.232   | -0.2069  |
| 28    | C    | 4.895    | -0.2268  | -0.2171  |
| 29    | C    | 4.895    | -0.2262  | -0.2167  |
| 30    | C    | 4.898    | -0.2219  | -0.2009  |
| 31    | C    | 4.898    | -0.2266  | -0.2033  |
| 32    | C    | 5.085    | -0.1883  | -0.1653  |
| 33    | C    | 5.085    | -0.1912  | -0.164   |
| 34    | C    | 5.096    | -0.1762  | -0.1796  |
| 35    | C    | 5.096    | -0.1734  | -0.1736  |
| 36    | C    | 5.096    | -0.1934  | -0.2049  |
| 37    | C    | 5.096    | -0.1893  | -0.2     |
| 38    | H    | 5.089    | 0.05407  | 0.137    |
| 39    | H    | 5.089    | 0.05407  | 0.1383   |
| 40    | H    | 5.311    | 0.1573   | 0.1558   |
| 41    | H    | 5.311    | 0.159    | 0.1565   |
| 42    | H    | 5.842    | 0.1366   | 0.1486   |
| 43    | H    | 5.842    | 0.1376   | 0.1489   |
| 44    | H    | 5.852    | 0.1396   | 0.1502   |
| 45    | H    | 5.852    | 0.14     | 0.1501   |
| 46    | H    | 5.853    | 0.1413   | 0.1519   |
| 47    | H    | 5.853    | 0.1407   | 0.152    |
| 48    | H    | 6.142    | 0.1353   | 0.1456   |
| 49    | H    | 6.142    | 0.1355   | 0.1454   |
| 50    | H    | 6.153    | 0.1293   | 0.1484   |
| 51    | H    | 6.153    | 0.129    | 0.1468   |
| 52    | H    | 6.155    | 0.1349   | 0.1474   |
| 53    | H    | 6.155    | 0.1346   | 0.1463   |

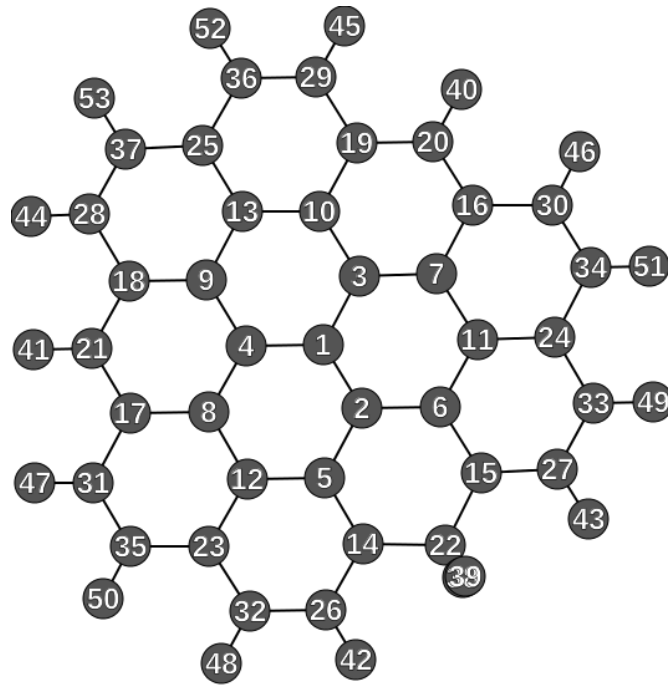

**Figure 9** Type I structure as a reference to data in the tables 9.

**Table 9** Partial charges for N-doped type I system with the total charge +1e for 6-31+G(2df, p) basis set

| Index | Atom | Distance | RESP     | MBIS     |
|-------|------|----------|----------|----------|
| 1     | N    | 0        | 0.1143   | -0.09297 |
| 2     | C    | 1.36     | 0.2403   | 0.2861   |
| 3     | C    | 1.421    | 0.01927  | 0.1543   |
| 4     | C    | 1.421    | 0.02801  | 0.1509   |
| 5     | C    | 2.427    | -0.2254  | -0.1197  |
| 6     | C    | 2.427    | -0.2235  | -0.1278  |
| 7     | C    | 2.441    | -0.08435 | -0.05709 |
| 8     | C    | 2.441    | -0.09285 | -0.04696 |
| 9     | C    | 2.457    | -0.05227 | -0.05054 |
| 10    | C    | 2.457    | -0.03849 | -0.05301 |
| 11    | C    | 2.825    | 0.1418   | 0.07342  |
| 12    | C    | 2.825    | 0.1435   | 0.06318  |
| 13    | C    | 2.864    | 0.04017  | 0.02317  |
| 14    | C    | 3.711    | 0.2447   | 0.1314   |
| 15    | C    | 3.711    | 0.242    | 0.1352   |
| 16    | C    | 3.75     | 0.2336   | 0.09473  |
| 17    | C    | 3.75     | 0.243    | 0.08799  |
| 18    | C    | 3.751    | 0.2178   | 0.09853  |
| 19    | C    | 3.751    | 0.1996   | 0.1065   |
| 20    | C    | 4.233    | -0.3363  | -0.2152  |
| 21    | C    | 4.233    | -0.3495  | -0.2111  |
| 22    | C    | 4.296    | -0.2303  | -0.3374  |
| 23    | C    | 4.238    | 0.07682  | 0.0583   |
| 24    | C    | 4.238    | 0.07472  | 0.05098  |
| 25    | C    | 4.262    | 0.1427   | 0.07654  |
| 26    | C    | 4.838    | -0.2389  | -0.2047  |
| 27    | C    | 4.838    | -0.2354  | -0.2088  |
| 28    | C    | 4.91     | -0.1917  | -0.1746  |
| 29    | C    | 4.91     | -0.1842  | -0.18    |
| 30    | C    | 4.911    | -0.2091  | -0.1721  |
| 31    | C    | 4.911    | -0.2111  | -0.169   |
| 32    | C    | 5.053    | -0.1196  | -0.1167  |
| 33    | C    | 5.053    | -0.1206  | -0.1155  |
| 34    | C    | 5.1      | -0.164   | -0.1676  |
| 35    | C    | 5.1      | -0.1664  | -0.1722  |
| 36    | C    | 5.108    | -0.1867  | -0.1563  |
| 37    | C    | 5.108    | -0.1842  | -0.1588  |
| 38    | H    | 5.037    | 0.1015   | 0.1758   |
| 39    | H    | 5.038    | 0.1015   | 0.1769   |
| 40    | H    | 5.319    | 0.1734   | 0.1691   |
| 41    | H    | 5.319    | 0.177    | 0.1687   |
| 42    | H    | 5.8      | 0.1636   | 0.1701   |
| 43    | H    | 5.8      | 0.1628   | 0.1711   |
| 44    | H    | 5.865    | 0.1591   | 0.1659   |
| 45    | H    | 5.865    | 0.1586   | 0.1678   |
| 46    | H    | 5.867    | 0.1614   | 0.1674   |
| 47    | H    | 5.867    | 0.1614   | 0.1681   |
| 48    | H    | 6.115    | 0.1528   | 0.1634   |
| 49    | H    | 6.115    | 0.153    | 0.1637   |
| 50    | H    | 6.153    | 0.1516   | 0.1671   |
| 51    | H    | 6.153    | 0.1505   | 0.1669   |
| 52    | H    | 6.165    | 0.1581   | 0.1656   |
| 53    | H    | 6.165    | 0.1565   | 0.1647   |

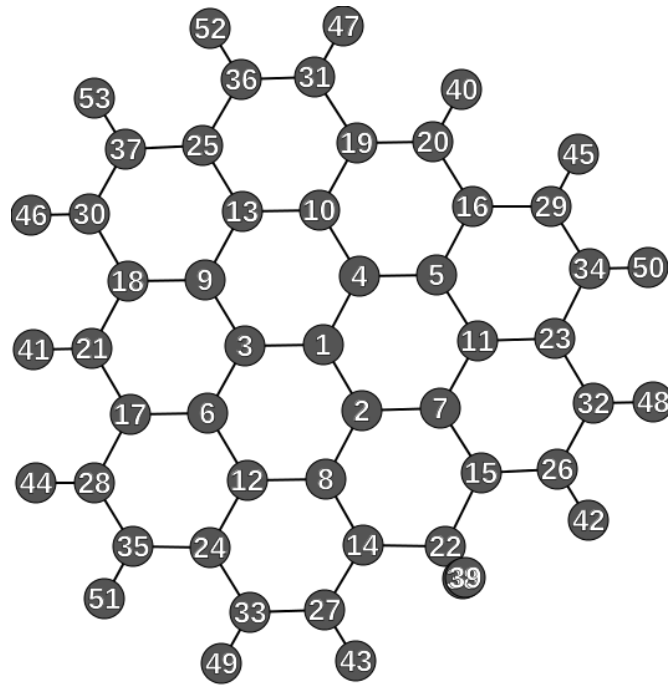

**Figure 10** Type I structure as a reference to data in the tables 10.

**Table 10** Partial charges for C-flake of type I system with the total charge -1e for Def2TZVP basis set

| Index | Atom | Distance | RESP      | MBIS      |
|-------|------|----------|-----------|-----------|
| 1     | C    | 0        | -0.00676  | -0.02972  |
| 2     | C    | 1.407    | -0.002496 | -0.07969  |
| 3     | C    | 1.422    | -0.02018  | -0.009882 |
| 4     | C    | 1.422    | -0.02885  | -0.003938 |
| 5     | C    | 2.458    | -0.04249  | -0.01884  |
| 6     | C    | 2.458    | -0.04998  | -0.008957 |
| 7     | C    | 2.462    | -0.1059   | 0.002368  |
| 8     | C    | 2.462    | -0.109    | 0.002941  |
| 9     | C    | 2.463    | -0.04606  | -0.005933 |
| 10    | C    | 2.463    | -0.0318   | -0.008893 |
| 11    | C    | 2.84     | 0.06951   | 0.01773   |
| 12    | C    | 2.84     | 0.0705    | 0.01631   |
| 13    | C    | 2.85     | 0.01771   | -0.002523 |
| 14    | C    | 3.749    | 0.129     | 0.03559   |
| 15    | C    | 3.749    | 0.1221    | 0.02972   |
| 16    | C    | 3.751    | 0.1901    | 0.08553   |
| 17    | C    | 3.751    | 0.1986    | 0.0836    |
| 18    | C    | 3.764    | 0.2263    | 0.1195    |
| 19    | C    | 3.764    | 0.2083    | 0.1184    |
| 20    | C    | 4.234    | -0.4262   | -0.3315   |
| 21    | C    | 4.234    | -0.4392   | -0.3347   |
| 22    | C    | 4.339    | -0.09409  | -0.2373   |
| 23    | C    | 4.255    | 0.08494   | 0.06886   |
| 24    | C    | 4.255    | 0.08715   | 0.06677   |
| 25    | C    | 4.269    | 0.09359   | 0.01442   |
| 26    | C    | 4.877    | -0.2319   | -0.2117   |
| 27    | C    | 4.877    | -0.2412   | -0.2159   |
| 28    | C    | 4.9      | -0.2269   | -0.2025   |
| 29    | C    | 4.9      | -0.2254   | -0.2051   |
| 30    | C    | 4.915    | -0.26     | -0.2553   |
| 31    | C    | 4.915    | -0.2547   | -0.2549   |
| 32    | C    | 5.091    | -0.2306   | -0.2369   |
| 33    | C    | 5.091    | -0.2259   | -0.2333   |
| 34    | C    | 5.093    | -0.2181   | -0.2122   |
| 35    | C    | 5.093    | -0.2212   | -0.2125   |
| 36    | C    | 5.101    | -0.2145   | -0.1772   |
| 37    | C    | 5.101    | -0.2143   | -0.1787   |
| 38    | H    | 5.084    | 0.02223   | 0.1025    |
| 39    | H    | 5.084    | 0.02223   | 0.1031    |
| 40    | H    | 5.32     | 0.1323    | 0.1299    |
| 41    | H    | 5.32     | 0.1369    | 0.1318    |
| 42    | H    | 5.838    | 0.1105    | 0.1252    |
| 43    | H    | 5.838    | 0.1125    | 0.1252    |
| 44    | H    | 5.859    | 0.1154    | 0.1256    |
| 45    | H    | 5.859    | 0.1158    | 0.1275    |
| 46    | H    | 5.874    | 0.1163    | 0.128     |
| 47    | H    | 5.874    | 0.1169    | 0.1272    |
| 48    | H    | 6.149    | 0.1136    | 0.1248    |
| 49    | H    | 6.149    | 0.1128    | 0.1236    |
| 50    | H    | 6.15     | 0.109     | 0.1253    |
| 51    | H    | 6.15     | 0.1102    | 0.1252    |
| 52    | H    | 6.158    | 0.1126    | 0.1212    |
| 53    | H    | 6.158    | 0.111     | 0.1219    |

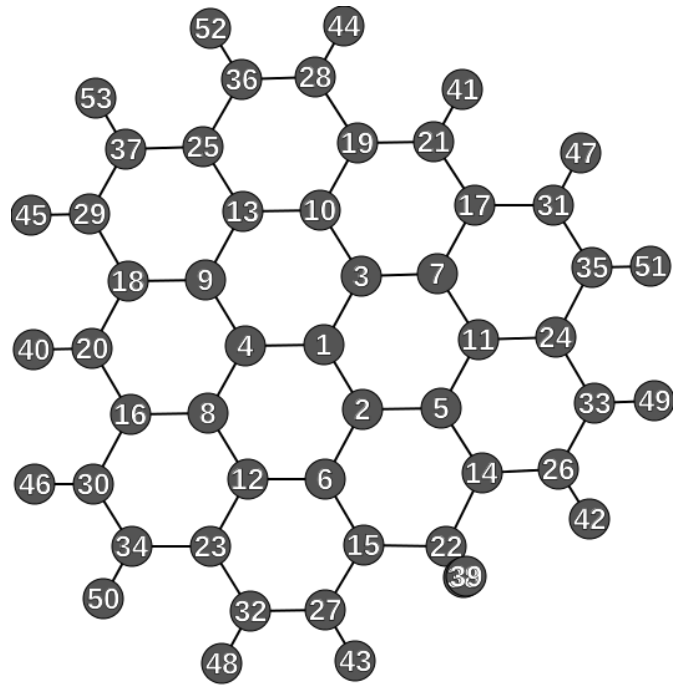

**Figure 11** Type I structure as a reference to data in the tables 11.

**Table 11** Partial charges for C-flake of type I system with the total charge 0e for Def2TZVP basis set

| Index | Atom | Distance | RESP      | MBIS      | ACKS2     |
|-------|------|----------|-----------|-----------|-----------|
| 1     | C    | 0        | -0.007508 | -0.01444  | -0.009806 |
| 2     | C    | 1.384    | 0.09081   | 0.0007256 | -0.01008  |
| 3     | C    | 1.435    | 0.0018    | 0.006882  | -0.00861  |
| 4     | C    | 1.435    | -0.002775 | 0.002206  | -0.00861  |
| 5     | C    | 2.446    | -0.1581   | -0.01675  | -0.01201  |
| 6     | C    | 2.446    | -0.1509   | -0.01238  | -0.01201  |
| 7     | C    | 2.456    | -0.06867  | -0.005948 | -0.009596 |
| 8     | C    | 2.456    | -0.06522  | -0.002417 | -0.009596 |
| 9     | C    | 2.468    | -0.02749  | -0.002957 | -0.009169 |
| 10    | C    | 2.468    | -0.03873  | -0.008133 | -0.009169 |
| 11    | C    | 2.828    | 0.09688   | 0.01053   | -0.007992 |
| 12    | C    | 2.828    | 0.09044   | 0.009191  | -0.007992 |
| 13    | C    | 2.854    | 0.02037   | 0.007523  | -0.007093 |
| 14    | C    | 3.728    | 0.1981    | 0.08623   | 0.004944  |
| 15    | C    | 3.728    | 0.1898    | 0.07856   | 0.004944  |
| 16    | C    | 3.761    | 0.2241    | 0.08247   | 0.009535  |
| 17    | C    | 3.761    | 0.2258    | 0.08499   | 0.009535  |
| 18    | C    | 3.761    | 0.1895    | 0.08404   | 0.009385  |
| 19    | C    | 3.761    | 0.2055    | 0.0841    | 0.009385  |
| 20    | C    | 4.239    | -0.372    | -0.2455   | -0.1877   |
| 21    | C    | 4.239    | -0.3799   | -0.2461   | -0.1877   |
| 22    | C    | 4.305    | -0.1451   | -0.2923   | -0.3345   |
| 23    | C    | 4.242    | 0.08231   | 0.07182   | 0.002946  |
| 24    | C    | 4.242    | 0.07691   | 0.06827   | 0.002946  |
| 25    | C    | 4.252    | 0.1431    | 0.06628   | 0.002737  |
| 26    | C    | 4.851    | -0.2486   | -0.2093   | -0.1681   |
| 27    | C    | 4.851    | -0.2398   | -0.2039   | -0.1681   |
| 28    | C    | 4.912    | -0.2047   | -0.1873   | -0.1559   |
| 29    | C    | 4.912    | -0.1979   | -0.1881   | -0.1559   |
| 30    | C    | 4.917    | -0.2196   | -0.1824   | -0.1558   |
| 31    | C    | 4.917    | -0.2196   | -0.1857   | -0.1558   |
| 32    | C    | 5.062    | -0.1772   | -0.1775   | -0.157    |
| 33    | C    | 5.062    | -0.1698   | -0.1768   | -0.157    |
| 34    | C    | 5.098    | -0.1751   | -0.1839   | -0.1542   |
| 35    | C    | 5.098    | -0.1749   | -0.1812   | -0.1542   |
| 36    | C    | 5.099    | -0.2129   | -0.1779   | -0.1539   |
| 37    | C    | 5.099    | -0.2142   | -0.1774   | -0.1539   |
| 38    | H    | 5.045    | 0.05871   | 0.143     | 0.1982    |
| 39    | H    | 5.045    | 0.05871   | 0.1433    | 0.1982    |
| 40    | H    | 5.323    | 0.153     | 0.1463    | 0.1787    |
| 41    | H    | 5.323    | 0.1555    | 0.1461    | 0.1787    |
| 42    | H    | 5.814    | 0.1377    | 0.1446    | 0.1609    |
| 43    | H    | 5.814    | 0.1362    | 0.1442    | 0.1609    |
| 44    | H    | 5.871    | 0.1361    | 0.1447    | 0.16      |
| 45    | H    | 5.871    | 0.1358    | 0.1447    | 0.16      |
| 46    | H    | 5.876    | 0.1367    | 0.1448    | 0.1595    |
| 47    | H    | 5.876    | 0.1365    | 0.1461    | 0.1595    |
| 48    | H    | 6.121    | 0.1345    | 0.1414    | 0.1585    |
| 49    | H    | 6.121    | 0.1328    | 0.1421    | 0.1585    |
| 50    | H    | 6.151    | 0.1251    | 0.1444    | 0.158     |
| 51    | H    | 6.151    | 0.126     | 0.1453    | 0.158     |
| 52    | H    | 6.153    | 0.1355    | 0.1423    | 0.1587    |
| 53    | H    | 6.153    | 0.137     | 0.1424    | 0.1587    |

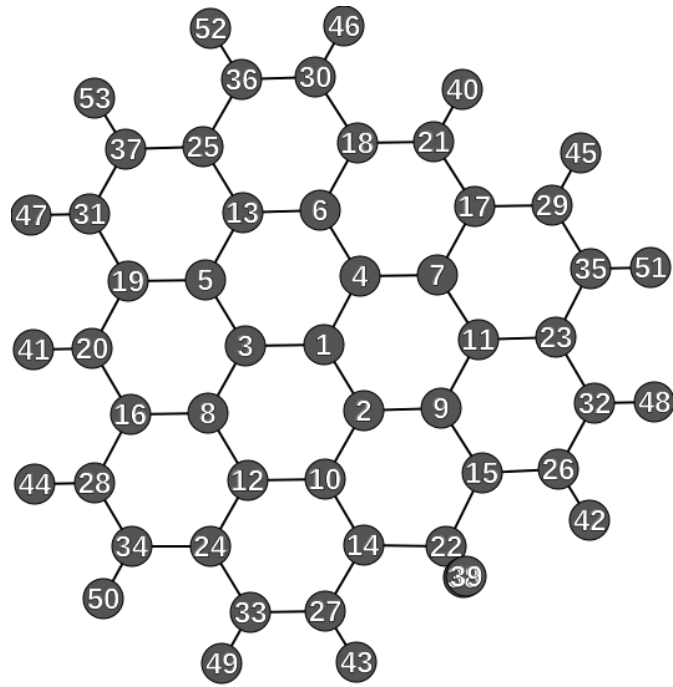

**Figure 12** Type I structure as a reference to data in the tables 12.



**Table 12** Partial charges for C-flake type I system with the total charge +1e for Def2TZVP basis set

| Index | Atom | Distance | RESP      | MBIS      |
|-------|------|----------|-----------|-----------|
| 1     | C    | 0        | 0.001933  | -0.004219 |
| 2     | C    | 1.411    | 0.1769    | 0.1018    |
| 3     | C    | 1.42     | 0.005943  | 0.008899  |
| 4     | C    | 1.42     | -0.001548 | 0.005409  |
| 5     | C    | 2.453    | -0.02161  | 0.01357   |
| 6     | C    | 2.453    | -0.009694 | 0.01675   |
| 7     | C    | 2.453    | -0.04535  | 0.009273  |
| 8     | C    | 2.453    | -0.0566   | 0.005974  |
| 9     | C    | 2.457    | -0.1871   | -0.05669  |
| 10    | C    | 2.457    | -0.1876   | -0.06111  |
| 11    | C    | 2.832    | 0.08459   | 0.01652   |
| 12    | C    | 2.832    | 0.09119   | 0.0185    |
| 13    | C    | 2.833    | 0.01151   | -0.002872 |
| 14    | C    | 3.74     | 0.2808    | 0.1546    |
| 15    | C    | 3.74     | 0.2836    | 0.1492    |
| 16    | C    | 3.746    | 0.2254    | 0.07285   |
| 17    | C    | 3.746    | 0.2138    | 0.06675   |
| 18    | C    | 3.749    | 0.1647    | 0.03571   |
| 19    | C    | 3.749    | 0.1819    | 0.04102   |
| 20    | C    | 4.223    | -0.3015   | -0.1474   |
| 21    | C    | 4.223    | -0.2884   | -0.1422   |
| 22    | C    | 4.306    | -0.2824   | -0.3507   |
| 23    | C    | 4.24     | 0.09073   | 0.05928   |
| 24    | C    | 4.24     | 0.08662   | 0.0625    |
| 25    | C    | 4.249    | 0.2066    | 0.1407    |
| 26    | C    | 4.872    | -0.2519   | -0.2126   |
| 27    | C    | 4.872    | -0.2522   | -0.2167   |
| 28    | C    | 4.902    | -0.1978   | -0.1597   |
| 29    | C    | 4.902    | -0.1937   | -0.1605   |
| 30    | C    | 4.902    | -0.1415   | -0.1119   |
| 31    | C    | 4.902    | -0.1483   | -0.1135   |
| 32    | C    | 5.071    | -0.1143   | -0.1047   |
| 33    | C    | 5.071    | -0.1121   | -0.1065   |
| 34    | C    | 5.09     | -0.1512   | -0.1478   |
| 35    | C    | 5.09     | -0.1528   | -0.1462   |
| 36    | C    | 5.093    | -0.2193   | -0.1968   |
| 37    | C    | 5.093    | -0.2177   | -0.1972   |
| 38    | H    | 5.052    | 0.1188    | 0.1832    |
| 39    | H    | 5.052    | 0.1188    | 0.1831    |
| 40    | H    | 5.307    | 0.1629    | 0.1588    |
| 41    | H    | 5.307    | 0.1664    | 0.1593    |
| 42    | H    | 5.834    | 0.1616    | 0.1672    |
| 43    | H    | 5.834    | 0.1622    | 0.1678    |
| 44    | H    | 5.86     | 0.1586    | 0.1615    |
| 45    | H    | 5.86     | 0.1582    | 0.1618    |
| 46    | H    | 5.86     | 0.1537    | 0.1589    |
| 47    | H    | 5.86     | 0.1539    | 0.1587    |
| 48    | H    | 6.128    | 0.1484    | 0.1577    |
| 49    | H    | 6.128    | 0.1484    | 0.1591    |
| 50    | H    | 6.143    | 0.1483    | 0.161     |
| 51    | H    | 6.143    | 0.1484    | 0.1608    |
| 52    | H    | 6.147    | 0.1605    | 0.1669    |
| 53    | H    | 6.147    | 0.1592    | 0.1677    |

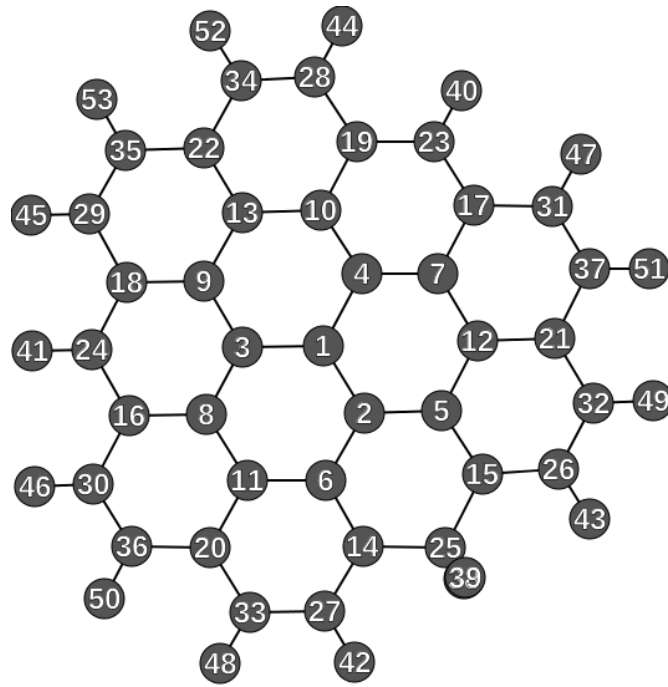

**Figure 13** Type I structure as a reference to data in the tables 13.

**Table 13** Partial charges for B-doped type I system with the total charge -1e for Def2TZVP basis set

| Index | Atom | Distance | RESP     | MBIS     | ACKS2     |
|-------|------|----------|----------|----------|-----------|
| 1     | B    | 0        | 0.05827  | 0.2684   | 0.2509    |
| 2     | C    | 1.46     | -0.1797  | -0.3739  | -0.4627   |
| 3     | C    | 1.501    | -0.1391  | -0.2512  | -0.4378   |
| 4     | C    | 1.501    | -0.1348  | -0.2435  | -0.4378   |
| 5     | C    | 2.483    | -0.02055 | 0.08884  | 0.03223   |
| 6     | C    | 2.483    | -0.01843 | 0.09587  | 0.03222   |
| 7     | C    | 2.496    | 0.003713 | 0.06085  | 0.0343    |
| 8     | C    | 2.496    | 0.01382  | 0.06609  | 0.0343    |
| 9     | C    | 2.505    | 0.02516  | 0.06093  | 0.0336    |
| 10    | C    | 2.505    | 0.01874  | 0.05902  | 0.0336    |
| 11    | C    | 2.845    | -0.02641 | -0.04385 | -0.06103  |
| 12    | C    | 2.845    | -0.01756 | -0.03086 | -0.06103  |
| 13    | C    | 2.862    | -0.04154 | -0.01397 | -0.05961  |
| 14    | C    | 3.775    | 0.1254   | 0.03648  | -0.001834 |
| 15    | C    | 3.775    | 0.1253   | 0.0389   | -0.001834 |
| 16    | C    | 3.801    | 0.197    | 0.07823  | 0.003575  |
| 17    | C    | 3.801    | 0.2076   | 0.07349  | 0.003575  |
| 18    | C    | 3.803    | 0.1762   | 0.07585  | 0.003393  |
| 19    | C    | 3.803    | 0.1859   | 0.07298  | 0.003394  |
| 20    | C    | 4.259    | 0.1286   | 0.07988  | 0.007094  |
| 21    | C    | 4.259    | 0.1199   | 0.0698   | 0.007094  |
| 22    | C    | 4.261    | 0.1574   | 0.05907  | 0.00677   |
| 23    | C    | 4.273    | -0.4095  | -0.2793  | -0.1803   |
| 24    | C    | 4.273    | -0.4005  | -0.2858  | -0.1803   |
| 25    | C    | 4.342    | -0.06232 | -0.2347  | -0.3232   |
| 26    | C    | 4.894    | -0.2451  | -0.222   | -0.1677   |
| 27    | C    | 4.894    | -0.2402  | -0.2185  | -0.1677   |
| 28    | C    | 4.946    | -0.216   | -0.2043  | -0.1565   |
| 29    | C    | 4.946    | -0.2145  | -0.2042  | -0.1565   |
| 30    | C    | 4.951    | -0.2209  | -0.2026  | -0.1566   |
| 31    | C    | 4.951    | -0.2267  | -0.1992  | -0.1566   |
| 32    | C    | 5.093    | -0.2377  | -0.2311  | -0.1595   |
| 33    | C    | 5.093    | -0.245   | -0.2391  | -0.1595   |
| 34    | C    | 5.114    | -0.2433  | -0.2019  | -0.1563   |
| 35    | C    | 5.114    | -0.2408  | -0.2035  | -0.1563   |
| 36    | C    | 5.114    | -0.2061  | -0.1925  | -0.1565   |
| 37    | C    | 5.114    | -0.2016  | -0.1909  | -0.1565   |
| 38    | H    | 5.084    | 0.0218   | 0.1098   | 0.1939    |
| 39    | H    | 5.084    | 0.0218   | 0.1098   | 0.1939    |
| 40    | H    | 5.359    | 0.1341   | 0.1239   | 0.1753    |
| 41    | H    | 5.359    | 0.1309   | 0.1265   | 0.1753    |
| 42    | H    | 5.863    | 0.108    | 0.1221   | 0.1583    |
| 43    | H    | 5.863    | 0.1095   | 0.1232   | 0.1583    |
| 44    | H    | 5.914    | 0.1131   | 0.1252   | 0.1576    |
| 45    | H    | 5.914    | 0.1138   | 0.1252   | 0.1576    |
| 46    | H    | 5.918    | 0.1118   | 0.1253   | 0.1571    |
| 47    | H    | 5.918    | 0.1122   | 0.124    | 0.1571    |
| 48    | H    | 6.151    | 0.1158   | 0.1215   | 0.157     |
| 49    | H    | 6.151    | 0.1151   | 0.1208   | 0.157     |
| 50    | H    | 6.167    | 0.1045   | 0.1241   | 0.157     |
| 51    | H    | 6.167    | 0.1037   | 0.1231   | 0.157     |
| 52    | H    | 6.167    | 0.1147   | 0.1228   | 0.1576    |
| 53    | H    | 6.167    | 0.1147   | 0.1241   | 0.1576    |

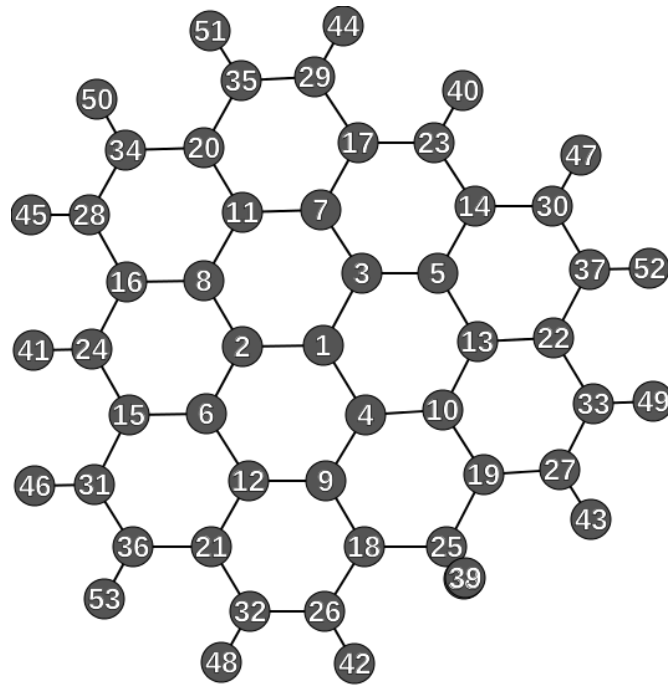

**Figure 14** Type I structure as a reference to data in the tables 14.

**Table 14** Partial charges for B-doped type I system with the total charge 0e for Def2TZVP basis set

| Index | Atom | Distance | RESP      | MBIS     |
|-------|------|----------|-----------|----------|
| 1     | B    | 0        | 0.2055    | 0.4259   |
| 2     | C    | 1.497    | -0.2255   | -0.32    |
| 3     | C    | 1.497    | -0.2216   | -0.3265  |
| 4     | C    | 1.498    | -0.02722  | -0.2147  |
| 5     | C    | 2.49     | 0.0361    | 0.1017   |
| 6     | C    | 2.49     | 0.04532   | 0.09346  |
| 7     | C    | 2.492    | 0.08229   | 0.1003   |
| 8     | C    | 2.492    | 0.08811   | 0.09968  |
| 9     | C    | 2.508    | -0.09911  | 0.02133  |
| 10    | C    | 2.508    | -0.09835  | 0.02351  |
| 11    | C    | 2.849    | -0.1061   | -0.05335 |
| 12    | C    | 2.849    | -0.01365  | -0.0195  |
| 13    | C    | 2.849    | -0.007451 | -0.02463 |
| 14    | C    | 3.79     | 0.2002    | 0.04592  |
| 15    | C    | 3.79     | 0.1894    | 0.04805  |
| 16    | C    | 3.791    | 0.1539    | 0.043    |
| 17    | C    | 3.791    | 0.1629    | 0.04705  |
| 18    | C    | 3.794    | 0.2275    | 0.1028   |
| 19    | C    | 3.794    | 0.2231    | 0.1016   |
| 20    | C    | 4.243    | 0.2226    | 0.113    |
| 21    | C    | 4.251    | 0.1416    | 0.07138  |
| 22    | C    | 4.251    | 0.1357    | 0.07557  |
| 23    | C    | 4.257    | -0.3328   | -0.1894  |
| 24    | C    | 4.257    | -0.3239   | -0.192   |
| 25    | C    | 4.356    | -0.2071   | -0.2926  |
| 26    | C    | 4.918    | -0.2575   | -0.2252  |
| 27    | C    | 4.918    | -0.2576   | -0.2247  |
| 28    | C    | 4.936    | -0.1796   | -0.1588  |
| 29    | C    | 4.936    | -0.1814   | -0.1669  |
| 30    | C    | 4.941    | -0.2095   | -0.1718  |
| 31    | C    | 4.941    | -0.2036   | -0.1712  |
| 32    | C    | 5.095    | -0.1711   | -0.1513  |
| 33    | C    | 5.095    | -0.1674   | -0.1541  |
| 34    | C    | 5.101    | -0.2407   | -0.2055  |
| 35    | C    | 5.101    | -0.2424   | -0.1992  |
| 36    | C    | 5.109    | -0.2058   | -0.1884  |
| 37    | C    | 5.109    | -0.2021   | -0.189   |
| 38    | H    | 5.1      | 0.08129   | 0.1496   |
| 39    | H    | 5.1      | 0.08129   | 0.1485   |
| 40    | H    | 5.342    | 0.1467    | 0.1384   |
| 41    | H    | 5.342    | 0.144     | 0.1392   |
| 42    | H    | 5.889    | 0.1383    | 0.1475   |
| 43    | H    | 5.889    | 0.1389    | 0.1482   |
| 44    | H    | 5.903    | 0.1335    | 0.142    |
| 45    | H    | 5.903    | 0.1339    | 0.1411   |
| 46    | H    | 5.907    | 0.1358    | 0.1429   |
| 47    | H    | 5.907    | 0.1364    | 0.1427   |
| 48    | H    | 6.149    | 0.1328    | 0.1396   |
| 49    | H    | 6.149    | 0.1325    | 0.1395   |
| 50    | H    | 6.153    | 0.1373    | 0.1451   |
| 51    | H    | 6.153    | 0.1372    | 0.1433   |
| 52    | H    | 6.161    | 0.1285    | 0.1425   |
| 53    | H    | 6.161    | 0.129     | 0.1426   |

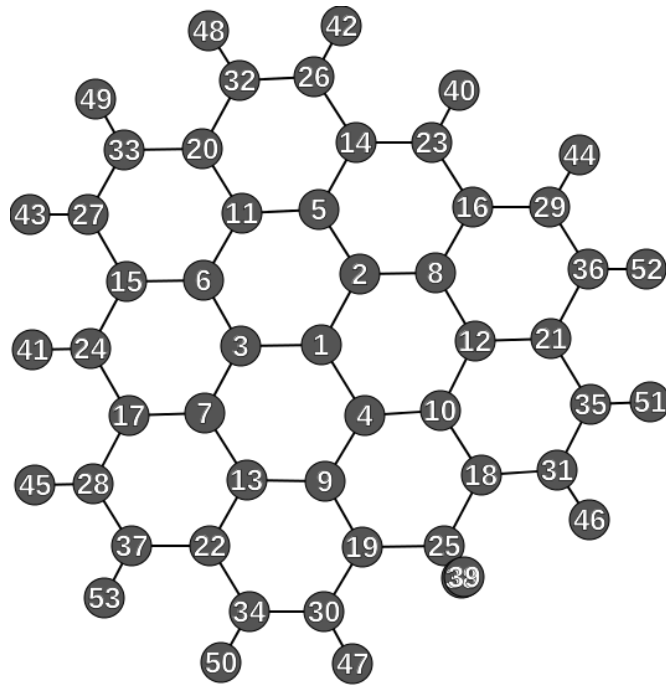

**Figure 15** Type I structure as a reference to data in the tables 15.

**Table 15** Partial charges for B-doped type I system with the total charge +1e for Def2TZVP basis set

| Index | Atom | Distance | RESP     | MBIS      |
|-------|------|----------|----------|-----------|
| 1     | B    | 0        | 0.227    | 0.4396    |
| 2     | C    | 1.484    | -0.2553  | -0.3508   |
| 3     | C    | 1.484    | -0.2506  | -0.3592   |
| 4     | C    | 1.534    | 0.122    | -0.03704  |
| 5     | C    | 2.476    | 0.1338   | 0.1348    |
| 6     | C    | 2.476    | 0.127    | 0.1424    |
| 7     | C    | 2.487    | 0.04108  | 0.108     |
| 8     | C    | 2.487    | 0.04996  | 0.1011    |
| 9     | C    | 2.521    | -0.1594  | -0.04772  |
| 10    | C    | 2.521    | -0.1605  | -0.04169  |
| 11    | C    | 2.831    | -0.1537  | -0.0878   |
| 12    | C    | 2.851    | 0.007464 | 0.0004086 |
| 13    | C    | 2.851    | 0.01189  | 0.0001246 |
| 14    | C    | 3.778    | 0.133    | 0.01522   |
| 15    | C    | 3.778    | 0.1434   | 0.009959  |
| 16    | C    | 3.778    | 0.1933   | 0.03648   |
| 17    | C    | 3.778    | 0.2037   | 0.03688   |
| 18    | C    | 3.81     | 0.3382   | 0.2067    |
| 19    | C    | 3.81     | 0.3335   | 0.2082    |
| 20    | C    | 4.229    | 0.2932   | 0.1711    |
| 21    | C    | 4.246    | 0.1223   | 0.05214   |
| 22    | C    | 4.246    | 0.1198   | 0.0513    |
| 23    | C    | 4.243    | -0.2576  | -0.117    |
| 24    | C    | 4.243    | -0.2671  | -0.1142   |
| 25    | C    | 4.354    | -0.3541  | -0.381    |
| 26    | C    | 4.926    | -0.132   | -0.1127   |
| 27    | C    | 4.926    | -0.1356  | -0.1072   |
| 28    | C    | 4.931    | -0.1867  | -0.1402   |
| 29    | C    | 4.931    | -0.182   | -0.1357   |
| 30    | C    | 4.94     | -0.2845  | -0.2574   |
| 31    | C    | 4.94     | -0.2866  | -0.2605   |
| 32    | C    | 5.09     | -0.2468  | -0.2039   |
| 33    | C    | 5.09     | -0.2469  | -0.2077   |
| 34    | C    | 5.096    | -0.07245 | -0.04375  |
| 35    | C    | 5.096    | -0.07293 | -0.04199  |
| 36    | C    | 5.106    | -0.1855  | -0.177    |
| 37    | C    | 5.106    | -0.1839  | -0.1746   |
| 38    | H    | 5.106    | 0.1476   | 0.2039    |
| 39    | H    | 5.106    | 0.1476   | 0.2037    |
| 40    | H    | 5.328    | 0.1562   | 0.1535    |
| 41    | H    | 5.328    | 0.1588   | 0.1525    |
| 42    | H    | 5.893    | 0.1517   | 0.1559    |
| 43    | H    | 5.893    | 0.1517   | 0.1551    |
| 44    | H    | 5.895    | 0.1569   | 0.1585    |
| 45    | H    | 5.895    | 0.1575   | 0.1594    |
| 46    | H    | 5.912    | 0.1677   | 0.1761    |
| 47    | H    | 5.912    | 0.1678   | 0.1746    |
| 48    | H    | 6.141    | 0.1595   | 0.1643    |
| 49    | H    | 6.141    | 0.1592   | 0.1646    |
| 50    | H    | 6.148    | 0.1462   | 0.1563    |
| 51    | H    | 6.148    | 0.1462   | 0.1552    |
| 52    | H    | 6.157    | 0.1493   | 0.1601    |
| 53    | H    | 6.157    | 0.1493   | 0.1598    |

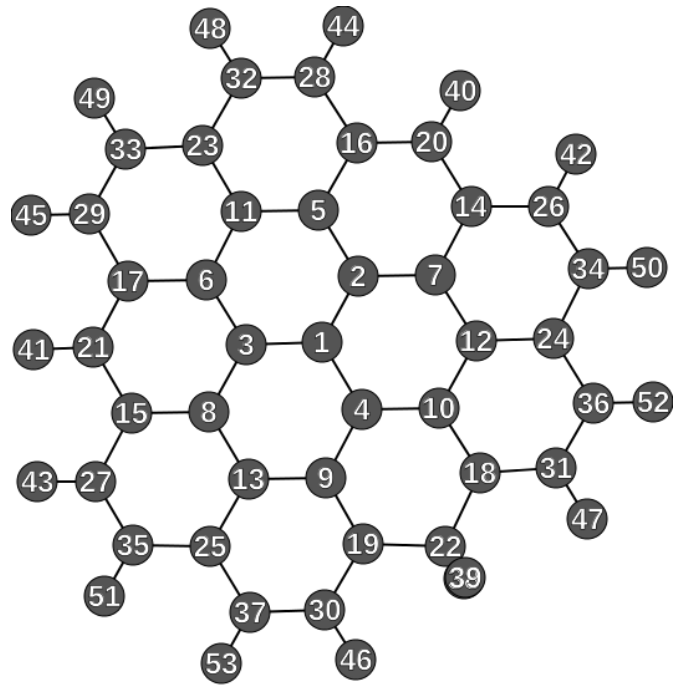

**Figure 16** Type I structure as a reference to data in the tables 16.



**Table 16** Partial charges for N-doped type I system with the total charge -1e for Def2TZVP basis set

| Index | Atom | Distance | RESP      | MBIS      |
|-------|------|----------|-----------|-----------|
| 1     | N    | 0        | 0.1416    | -0.09959  |
| 2     | C    | 1.382    | 0.0256    | 0.193     |
| 3     | C    | 1.382    | 0.02909   | 0.1948    |
| 4     | C    | 1.437    | -0.1223   | -0.08992  |
| 5     | C    | 2.425    | -0.0979   | -0.09709  |
| 6     | C    | 2.425    | -0.1042   | -0.1002   |
| 7     | C    | 2.431    | -0.06761  | -0.09141  |
| 8     | C    | 2.431    | -0.06688  | -0.08962  |
| 9     | C    | 2.472    | -0.06921  | -0.006643 |
| 10    | C    | 2.472    | -0.0674   | -0.0123   |
| 11    | C    | 2.826    | 0.09478   | 0.06952   |
| 12    | C    | 2.854    | 0.06126   | 0.02604   |
| 13    | C    | 2.854    | 0.06059   | 0.01878   |
| 14    | C    | 3.711    | 0.2023    | 0.1264    |
| 15    | C    | 3.711    | 0.1996    | 0.1235    |
| 16    | C    | 3.731    | 0.2378    | 0.1457    |
| 17    | C    | 3.731    | 0.2469    | 0.1478    |
| 18    | C    | 3.771    | 0.05493   | -0.009848 |
| 19    | C    | 3.771    | 0.05512   | -0.01243  |
| 20    | C    | 4.208    | -0.4512   | -0.3712   |
| 21    | C    | 4.208    | -0.4551   | -0.3681   |
| 22    | C    | 4.383    | -0.02389  | -0.2045   |
| 23    | C    | 4.23     | 0.04306   | -0.02281  |
| 24    | C    | 4.257    | 0.1041    | 0.0846    |
| 25    | C    | 4.257    | 0.1066    | 0.08624   |
| 26    | C    | 4.87     | -0.2343   | -0.223    |
| 27    | C    | 4.87     | -0.2299   | -0.2241   |
| 28    | C    | 4.882    | -0.2743   | -0.2604   |
| 29    | C    | 4.882    | -0.2826   | -0.2604   |
| 30    | C    | 4.894    | -0.1943   | -0.1663   |
| 31    | C    | 4.894    | -0.1996   | -0.1712   |
| 32    | C    | 5.067    | -0.194    | -0.1623   |
| 33    | C    | 5.067    | -0.1867   | -0.1623   |
| 34    | C    | 5.078    | -0.2059   | -0.1895   |
| 35    | C    | 5.078    | -0.2079   | -0.1834   |
| 36    | C    | 5.119    | -0.2857   | -0.3102   |
| 37    | C    | 5.119    | -0.291    | -0.3165   |
| 38    | H    | 5.13     | -0.003617 | 0.07987   |
| 39    | H    | 5.13     | -0.00362  | 0.08019   |
| 40    | H    | 5.292    | 0.1404    | 0.1388    |
| 41    | H    | 5.292    | 0.1402    | 0.1376    |
| 42    | H    | 5.822    | 0.118     | 0.1287    |
| 43    | H    | 5.822    | 0.1175    | 0.1285    |
| 44    | H    | 5.84     | 0.1212    | 0.133     |
| 45    | H    | 5.84     | 0.123     | 0.1335    |
| 46    | H    | 5.853    | 0.1065    | 0.1194    |
| 47    | H    | 5.853    | 0.108     | 0.1207    |
| 48    | H    | 6.124    | 0.1129    | 0.1228    |
| 49    | H    | 6.124    | 0.1112    | 0.1226    |
| 50    | H    | 6.137    | 0.1108    | 0.1268    |
| 51    | H    | 6.137    | 0.111     | 0.1251    |
| 52    | H    | 6.175    | 0.1173    | 0.1261    |
| 53    | H    | 6.175    | 0.1178    | 0.1274    |

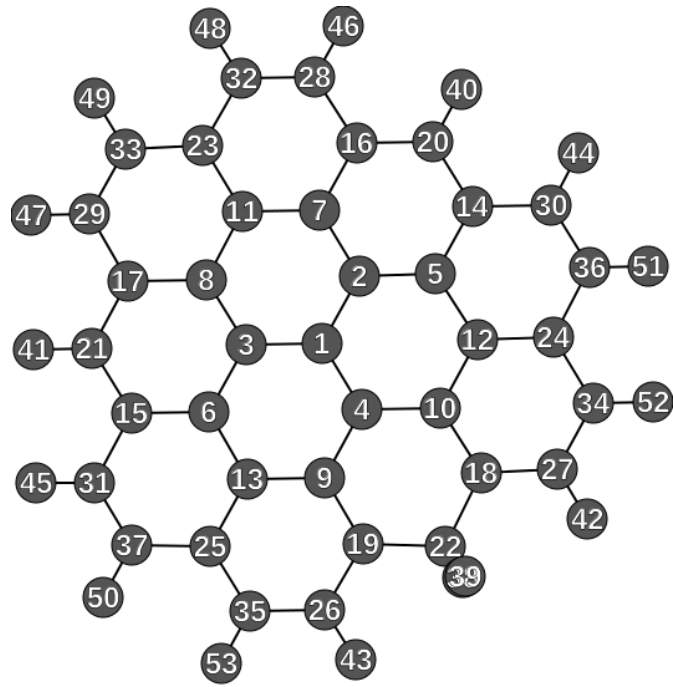

Figure 17 Type I structure as a reference to data in the tables 17.

**Table 17** Partial charges for N-doped type I system with the total charge 0e for Def2TZVP basis set

| Index | Atom | Distance | RESP     | MBIS     |
|-------|------|----------|----------|----------|
| 1     | N    | 0        | 0.1072   | -0.1364  |
| 2     | C    | 1.4      | 0.02802  | 0.1898   |
| 3     | C    | 1.4      | 0.03025  | 0.1873   |
| 4     | C    | 1.408    | 0.06987  | 0.1193   |
| 5     | C    | 2.433    | -0.08518 | -0.09578 |
| 6     | C    | 2.433    | -0.09063 | -0.09259 |
| 7     | C    | 2.434    | -0.07093 | -0.08566 |
| 8     | C    | 2.434    | -0.07479 | -0.07639 |
| 9     | C    | 2.456    | -0.1619  | -0.07741 |
| 10    | C    | 2.456    | -0.1616  | -0.07727 |
| 11    | C    | 2.835    | 0.07046  | 0.05253  |
| 12    | C    | 2.841    | 0.1057   | 0.04722  |
| 13    | C    | 2.841    | 0.1095   | 0.05006  |
| 14    | C    | 3.726    | 0.2229   | 0.1202   |
| 15    | C    | 3.726    | 0.2297   | 0.1167   |
| 16    | C    | 3.732    | 0.2192   | 0.1295   |
| 17    | C    | 3.732    | 0.2243   | 0.115    |
| 18    | C    | 3.742    | 0.1703   | 0.08125  |
| 19    | C    | 3.742    | 0.17     | 0.07952  |
| 20    | C    | 4.216    | -0.3975  | -0.2961  |
| 21    | C    | 4.216    | -0.4024  | -0.2907  |
| 22    | C    | 4.335    | -0.1385  | -0.2837  |
| 23    | C    | 4.229    | 0.09485  | 0.03104  |
| 24    | C    | 4.243    | 0.07882  | 0.05486  |
| 25    | C    | 4.243    | 0.07463  | 0.05681  |
| 26    | C    | 4.87     | -0.2323  | -0.2025  |
| 27    | C    | 4.87     | -0.229   | -0.2023  |
| 28    | C    | 4.884    | -0.2262  | -0.2115  |
| 29    | C    | 4.884    | -0.2256  | -0.2049  |
| 30    | C    | 4.886    | -0.2214  | -0.1997  |
| 31    | C    | 4.886    | -0.2262  | -0.196   |
| 32    | C    | 5.073    | -0.1878  | -0.1622  |
| 33    | C    | 5.073    | -0.1905  | -0.1606  |
| 34    | C    | 5.084    | -0.1924  | -0.1904  |
| 35    | C    | 5.084    | -0.1881  | -0.1904  |
| 36    | C    | 5.084    | -0.1752  | -0.1666  |
| 37    | C    | 5.084    | -0.1723  | -0.1712  |
| 38    | H    | 5.076    | 0.05337  | 0.1342   |
| 39    | H    | 5.076    | 0.05337  | 0.1344   |
| 40    | H    | 5.299    | 0.1562   | 0.152    |
| 41    | H    | 5.299    | 0.158    | 0.1521   |
| 42    | H    | 5.829    | 0.1358   | 0.1459   |
| 43    | H    | 5.829    | 0.1368   | 0.1458   |
| 44    | H    | 5.839    | 0.1388   | 0.1478   |
| 45    | H    | 5.839    | 0.1392   | 0.1473   |
| 46    | H    | 5.84     | 0.1406   | 0.1481   |
| 47    | H    | 5.84     | 0.1399   | 0.1471   |
| 48    | H    | 6.128    | 0.1344   | 0.1424   |
| 49    | H    | 6.128    | 0.1344   | 0.1417   |
| 50    | H    | 6.139    | 0.128    | 0.1443   |
| 51    | H    | 6.139    | 0.1284   | 0.1428   |
| 52    | H    | 6.14     | 0.1339   | 0.1422   |
| 53    | H    | 6.14     | 0.1335   | 0.1416   |

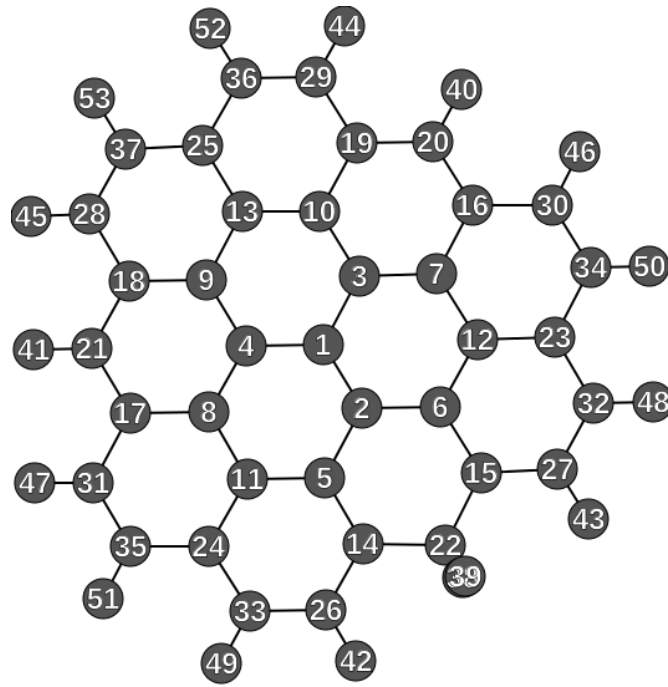

**Figure 18** Type I structure as a reference to data in the tables 18.

**Table 18** Partial charges for N-doped type I system with the total charge +1e for Def2TZVP basis set

| Index | Atom | Distance | RESP     | MBIS     | ACKS2     |
|-------|------|----------|----------|----------|-----------|
| 1     | N    | 0        | 0.1163   | -0.09289 | -0.07418  |
| 2     | C    | 1.358    | 0.2409   | 0.289    | 0.4146    |
| 3     | C    | 1.419    | 0.02075  | 0.1568   | 0.3794    |
| 4     | C    | 1.419    | 0.02508  | 0.1528   | 0.3794    |
| 5     | C    | 2.422    | -0.2283  | -0.1266  | -0.06596  |
| 6     | C    | 2.422    | -0.2227  | -0.1283  | -0.06596  |
| 7     | C    | 2.436    | -0.08727 | -0.06047 | -0.06089  |
| 8     | C    | 2.436    | -0.09063 | -0.05921 | -0.06089  |
| 9     | C    | 2.453    | -0.05102 | -0.05121 | -0.05935  |
| 10    | C    | 2.453    | -0.04043 | -0.05374 | -0.05935  |
| 11    | C    | 2.819    | 0.1445   | 0.07036  | 0.03631   |
| 12    | C    | 2.819    | 0.1392   | 0.07461  | 0.03631   |
| 13    | C    | 2.858    | 0.04049  | 0.02333  | 0.0359    |
| 14    | C    | 3.702    | 0.2479   | 0.1352   | 0.01212   |
| 15    | C    | 3.702    | 0.2421   | 0.1344   | 0.01212   |
| 16    | C    | 3.742    | 0.2398   | 0.09066  | 0.01608   |
| 17    | C    | 3.742    | 0.2414   | 0.09181  | 0.01608   |
| 18    | C    | 3.743    | 0.217    | 0.09129  | 0.01585   |
| 19    | C    | 3.743    | 0.2019   | 0.09364  | 0.01585   |
| 20    | C    | 4.224    | -0.3398  | -0.2052  | -0.194    |
| 21    | C    | 4.224    | -0.3472  | -0.206   | -0.194    |
| 22    | C    | 4.285    | -0.2301  | -0.3394  | -0.343    |
| 23    | C    | 4.228    | 0.08009  | 0.0516   | -0.001214 |
| 24    | C    | 4.228    | 0.07648  | 0.04907  | -0.001214 |
| 25    | C    | 4.252    | 0.1435   | 0.07968  | -0.001329 |
| 26    | C    | 4.826    | -0.2395  | -0.2032  | -0.1683   |
| 27    | C    | 4.826    | -0.2335  | -0.2013  | -0.1683   |
| 28    | C    | 4.899    | -0.1906  | -0.1654  | -0.1556   |
| 29    | C    | 4.899    | -0.1835  | -0.1674  | -0.1556   |
| 30    | C    | 4.9      | -0.2106  | -0.1676  | -0.1553   |
| 31    | C    | 4.9      | -0.21    | -0.1687  | -0.1553   |
| 32    | C    | 5.04     | -0.1232  | -0.1128  | -0.1548   |
| 33    | C    | 5.04     | -0.1181  | -0.1106  | -0.1548   |
| 34    | C    | 5.088    | -0.1648  | -0.1661  | -0.1523   |
| 35    | C    | 5.088    | -0.1658  | -0.1606  | -0.1523   |
| 36    | C    | 5.096    | -0.1865  | -0.1586  | -0.1518   |
| 37    | C    | 5.096    | -0.1844  | -0.1618  | -0.1518   |
| 38    | H    | 5.025    | 0.1009   | 0.1754   | 0.2007    |
| 39    | H    | 5.025    | 0.1009   | 0.1748   | 0.2007    |
| 40    | H    | 5.307    | 0.1734   | 0.1659   | 0.1809    |
| 41    | H    | 5.307    | 0.1756   | 0.1662   | 0.1809    |
| 42    | H    | 5.786    | 0.1628   | 0.1682   | 0.1623    |
| 43    | H    | 5.786    | 0.1618   | 0.1673   | 0.1623    |
| 44    | H    | 5.852    | 0.1577   | 0.1627   | 0.1615    |
| 45    | H    | 5.852    | 0.1582   | 0.1621   | 0.1615    |
| 46    | H    | 5.854    | 0.1607   | 0.1644   | 0.1609    |
| 47    | H    | 5.854    | 0.1605   | 0.165    | 0.1609    |
| 48    | H    | 6.1      | 0.153    | 0.1605   | 0.1595    |
| 49    | H    | 6.1      | 0.1517   | 0.1598   | 0.1595    |
| 50    | H    | 6.139    | 0.1495   | 0.1645   | 0.1587    |
| 51    | H    | 6.139    | 0.1506   | 0.163    | 0.1587    |
| 52    | H    | 6.151    | 0.1573   | 0.1624   | 0.1594    |
| 53    | H    | 6.151    | 0.1558   | 0.1637   | 0.1594    |

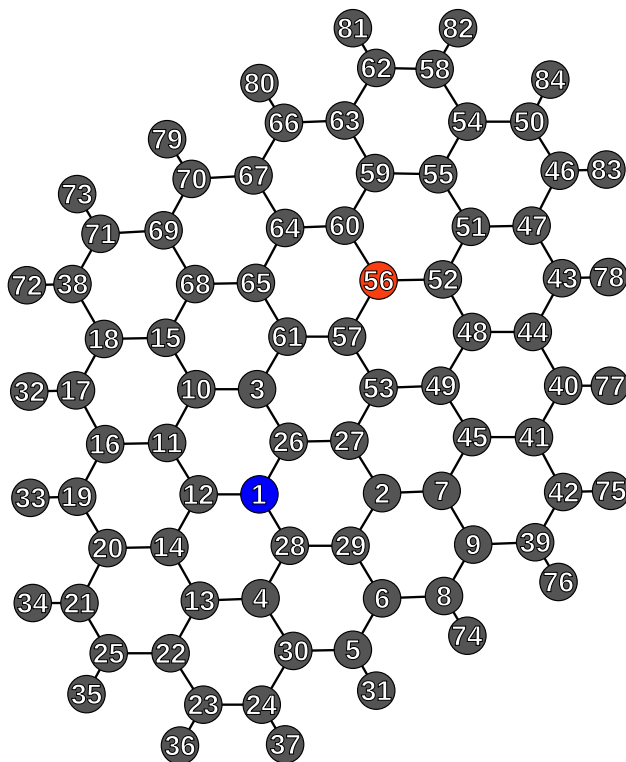

Figure 19 Type II structure as a reference to data in the tables 19-20.

Table 19 Partial charges of type II system for Def2TZVP basis set – MBIS, ACKS2; RESP-A1 model on the B3LYP – RESP fitting

| Total charge: |      | -1e     |         | 0e      |         |         | +1e     |         |
|---------------|------|---------|---------|---------|---------|---------|---------|---------|
| Index         | Atom | RESP    | MBIS    | RESP    | MBIS    | ACKS2   | RESP    | MBIS    |
| 1             | N    | 0.1627  | -0.1274 | 0.1634  | -0.1353 | -0.0768 | 0.1721  | -0.0903 |
| 2             | C    | 0.0159  | 0.0601  | 0.0297  | 0.0641  | 0.0391  | 0.0305  | 0.0561  |
| 3             | C    | -0.0454 | -0.1192 | -0.0607 | -0.124  | -0.0682 | -0.0416 | -0.0894 |
| 4             | C    | -0.0685 | -0.0605 | -0.0584 | -0.081  | -0.0603 | -0.0564 | -0.0648 |
| 5             | C    | -0.4071 | -0.3199 | -0.3759 | -0.2876 | -0.1937 | -0.3065 | -0.1821 |
| 6             | C    | 0.2479  | 0.1144  | 0.2603  | 0.1256  | 0.0228  | 0.2497  | 0.0873  |
| 7             | C    | -0.0609 | -0.0572 | -0.0665 | -0.0567 | -0.0162 | -0.0426 | -0.014  |
| 8             | C    | -0.4061 | -0.273  | -0.3944 | -0.2747 | -0.1874 | -0.3599 | -0.2186 |
| 9             | C    | 0.2075  | 0.0748  | 0.2147  | 0.1078  | 0.0139  | 0.2275  | 0.1068  |
| 10            | C    | 0.0159  | 0.0361  | 0.0297  | 0.0682  | 0.0391  | 0.0305  | 0.0468  |
| 11            | C    | -0.0528 | -0.0547 | -0.0595 | -0.0883 | -0.0625 | -0.0632 | -0.0662 |
| 12            | C    | -0.0003 | 0.1079  | 0.0019  | 0.1864  | 0.3925  | 0.0256  | 0.1899  |
| 13            | C    | 0.0586  | -0.0125 | 0.0531  | 0.0564  | 0.0383  | 0.0559  | 0.0463  |
| 14            | C    | -0.0685 | -0.044  | -0.0584 | -0.0825 | -0.0603 | -0.0564 | -0.0618 |
| 15            | C    | -0.0609 | -0.0372 | -0.0665 | -0.0512 | -0.0162 | -0.0426 | -0.0068 |
| 16            | C    | 0.2479  | 0.111   | 0.2603  | 0.1336  | 0.0228  | 0.2497  | 0.0812  |
| 17            | C    | -0.4061 | -0.2834 | -0.3944 | -0.2733 | -0.1874 | -0.3599 | -0.2175 |
| 18            | C    | 0.2075  | 0.0549  | 0.2147  | 0.102   | 0.0139  | 0.2275  | 0.1055  |
| 19            | C    | -0.4071 | -0.3322 | -0.3759 | -0.2922 | -0.1937 | -0.3065 | -0.1766 |
| 20            | C    | 0.1954  | 0.1354  | 0.1887  | 0.1182  | 0.0171  | 0.1726  | 0.0637  |
| 21            | C    | -0.2297 | -0.267  | -0.203  | -0.2058 | -0.1542 | -0.1621 | -0.1436 |
| 22            | C    | 0.1063  | 0.0016  | 0.1301  | 0.0209  | -0.0014 | 0.1718  | 0.0926  |
| 23            | C    | -0.2164 | -0.1532 | -0.2101 | -0.1554 | -0.1502 | -0.2081 | -0.175  |
| 24            | C    | -0.2297 | -0.2804 | -0.203  | -0.2071 | -0.1542 | -0.1621 | -0.1445 |
| 25            | C    | -0.2164 | -0.174  | -0.2101 | -0.1589 | -0.1502 | -0.2081 | -0.173  |
| 26            | C    | 0.0033  | 0.2399  | 0.0519  | 0.23    | 0.4131  | 0.0458  | 0.2046  |
| 27            | C    | -0.0454 | -0.1285 | -0.0607 | -0.1151 | -0.0682 | -0.0416 | -0.0969 |
| 28            | C    | -0.0003 | 0.1469  | 0.0019  | 0.1788  | 0.3925  | 0.0256  | 0.1953  |

Continued on next page

Table 19 – continued from previous page

| Index | Atom | RESP    | MBIS    | RESP    | MBIS    | RESP    | MBIS    | RESP    | MBIS |
|-------|------|---------|---------|---------|---------|---------|---------|---------|------|
| 29    | C    | -0.0528 | -0.0763 | -0.0595 | -0.0787 | -0.0625 | -0.0632 | -0.0759 |      |
| 30    | C    | 0.1954  | 0.1435  | 0.1887  | 0.1186  | 0.0171  | 0.1726  | 0.0691  |      |
| 31    | H    | 0.1489  | 0.1421  | 0.1611  | 0.1534  | 0.1827  | 0.1695  | 0.1624  |      |
| 32    | H    | 0.1522  | 0.1363  | 0.1653  | 0.1506  | 0.1821  | 0.1787  | 0.1611  |      |
| 33    | H    | 0.1489  | 0.1389  | 0.1611  | 0.1549  | 0.1827  | 0.1695  | 0.1619  |      |
| 34    | H    | 0.1258  | 0.1303  | 0.138   | 0.1493  | 0.1619  | 0.1526  | 0.1604  |      |
| 35    | H    | 0.1261  | 0.1259  | 0.141   | 0.1436  | 0.1599  | 0.1589  | 0.1637  |      |
| 36    | H    | 0.1261  | 0.1249  | 0.141   | 0.143   | 0.1599  | 0.1589  | 0.1643  |      |
| 37    | H    | 0.1258  | 0.1324  | 0.138   | 0.1486  | 0.1619  | 0.1526  | 0.161   |      |
| 38    | C    | -0.2489 | -0.1736 | -0.2223 | -0.1891 | -0.154  | -0.2279 | -0.2004 |      |
| 39    | C    | -0.2489 | -0.1812 | -0.2223 | -0.1914 | -0.154  | -0.2279 | -0.2021 |      |
| 40    | C    | -0.3555 | -0.2419 | -0.3322 | -0.205  | -0.1873 | -0.3091 | -0.1702 |      |
| 41    | C    | 0.1195  | 0.071   | 0.1456  | 0.0532  | 0.0082  | 0.1386  | 0.04    |      |
| 42    | C    | -0.1617 | -0.2054 | -0.1757 | -0.1686 | -0.1534 | -0.1501 | -0.1328 |      |
| 43    | C    | -0.3569 | -0.224  | -0.2912 | -0.1796 | -0.1797 | -0.26   | -0.1323 |      |
| 44    | C    | 0.1907  | 0.0566  | 0.187   | 0.0385  | 0.0104  | 0.195   | 0.0213  |      |
| 45    | C    | 0.046   | 0.0457  | 0.0695  | 0.0526  | 0.0025  | 0.0646  | 0.0426  |      |
| 46    | C    | -0.2056 | -0.1799 | -0.1674 | -0.1618 | -0.1553 | -0.1457 | -0.1348 |      |
| 47    | C    | 0.1463  | 0.0509  | 0.1282  | 0.0435  | 0.0052  | 0.1261  | 0.0237  |      |
| 48    | C    | 0.0834  | 0.0911  | 0.0841  | 0.1054  | 0.0398  | 0.077   | 0.1095  |      |
| 49    | C    | -0.1338 | -0.0761 | -0.1424 | -0.0782 | -0.0629 | -0.1174 | -0.0578 |      |
| 50    | C    | -0.2432 | -0.211  | -0.2445 | -0.1967 | -0.155  | -0.242  | -0.1929 |      |
| 51    | C    | 0.0744  | 0.0801  | 0.0865  | 0.0985  | 0.0381  | 0.1116  | 0.1227  |      |
| 52    | C    | -0.2312 | -0.3077 | -0.2476 | -0.328  | -0.4479 | -0.2628 | -0.3449 |      |
| 53    | C    | 0.1148  | 0.1448  | 0.1435  | 0.1412  | 0.0537  | 0.1233  | 0.1211  |      |
| 54    | C    | 0.1728  | 0.0865  | 0.2244  | 0.1071  | 0.0079  | 0.2641  | 0.1389  |      |
| 55    | C    | -0.0896 | -0.0326 | -0.1001 | -0.0451 | -0.0612 | -0.1303 | -0.0693 |      |
| 56    | B    | 0.1815  | 0.4211  | 0.2849  | 0.4587  | 0.2704  | 0.3151  | 0.4852  |      |
| 57    | C    | -0.2237 | -0.4045 | -0.2727 | -0.3765 | -0.4689 | -0.2288 | -0.3215 |      |
| 58    | C    | -0.2432 | -0.2118 | -0.2445 | -0.2001 | -0.155  | -0.242  | -0.1962 |      |
| 59    | C    | 0.0744  | 0.0791  | 0.0865  | 0.1014  | 0.0381  | 0.1116  | 0.1217  |      |
| 60    | C    | -0.2312 | -0.3126 | -0.2476 | -0.3248 | -0.4479 | -0.2628 | -0.3405 |      |
| 61    | C    | 0.1148  | 0.1418  | 0.1435  | 0.1425  | 0.0537  | 0.1233  | 0.1174  |      |
| 62    | C    | -0.2056 | -0.1796 | -0.1674 | -0.1595 | -0.1553 | -0.1457 | -0.136  |      |
| 63    | C    | 0.1463  | 0.0519  | 0.1282  | 0.0382  | 0.0052  | 0.1261  | 0.0302  |      |
| 64    | C    | 0.0834  | 0.0944  | 0.0841  | 0.1006  | 0.0398  | 0.077   | 0.1007  |      |
| 65    | C    | -0.1338 | -0.0763 | -0.1424 | -0.0724 | -0.0629 | -0.1174 | -0.0542 |      |
| 66    | C    | -0.3569 | -0.2343 | -0.2912 | -0.1802 | -0.1797 | -0.26   | -0.143  |      |
| 67    | C    | 0.1907  | 0.062   | 0.187   | 0.0376  | 0.0104  | 0.195   | 0.0321  |      |
| 68    | C    | 0.046   | 0.0404  | 0.0695  | 0.0466  | 0.0025  | 0.0646  | 0.0425  |      |
| 69    | C    | 0.1195  | 0.0871  | 0.1456  | 0.0526  | 0.0082  | 0.1386  | 0.0407  |      |
| 70    | C    | -0.3555 | -0.2605 | -0.3322 | -0.2017 | -0.1873 | -0.3091 | -0.172  |      |
| 71    | C    | -0.1617 | -0.232  | -0.1757 | -0.1671 | -0.1534 | -0.1501 | -0.1351 |      |
| 72    | H    | 0.1231  | 0.1323  | 0.1379  | 0.1478  | 0.1609  | 0.1539  | 0.1606  |      |
| 73    | H    | 0.1121  | 0.1351  | 0.1303  | 0.1444  | 0.1608  | 0.1451  | 0.1566  |      |
| 74    | H    | 0.1522  | 0.1373  | 0.1653  | 0.1513  | 0.1821  | 0.1787  | 0.1614  |      |
| 75    | H    | 0.1121  | 0.1344  | 0.1303  | 0.145   | 0.1608  | 0.1451  | 0.1557  |      |
| 76    | H    | 0.1231  | 0.1341  | 0.1379  | 0.1475  | 0.1609  | 0.1539  | 0.1605  |      |
| 77    | H    | 0.1433  | 0.1343  | 0.1583  | 0.1451  | 0.1797  | 0.17    | 0.1538  |      |
| 78    | H    | 0.1311  | 0.1294  | 0.1433  | 0.1383  | 0.1786  | 0.1542  | 0.1467  |      |
| 79    | H    | 0.1433  | 0.1357  | 0.1583  | 0.1435  | 0.1797  | 0.17    | 0.1544  |      |
| 80    | H    | 0.1311  | 0.1317  | 0.1433  | 0.1392  | 0.1786  | 0.1542  | 0.1485  |      |
| 81    | H    | 0.1148  | 0.132   | 0.1309  | 0.1415  | 0.1588  | 0.1443  | 0.1523  |      |
| 82    | H    | 0.1191  | 0.1321  | 0.1384  | 0.1446  | 0.1589  | 0.1533  | 0.1569  |      |
| 83    | H    | 0.1148  | 0.1312  | 0.1309  | 0.1418  | 0.1588  | 0.1443  | 0.1529  |      |
| 84    | H    | 0.1191  | 0.1325  | 0.1384  | 0.1436  | 0.1589  | 0.1533  | 0.1562  |      |

**Table 20** Partial charges of type II system for 6-31+G(2df, p) basis set – MBIS, ACKS2; RESP-A1 model on the B3LYP – RESP fitting

| Total charge: |      | -1e     |         | 0e      |         | +1e     |         |
|---------------|------|---------|---------|---------|---------|---------|---------|
| Index         | Atom | RESP    | MBIS    | RESP    | MBIS    | RESP    | MBIS    |
| 1             | N    | 0.1755  | -0.1428 | 0.1742  | -0.1428 | 0.1867  | -0.0919 |
| 2             | C    | 0.0116  | 0.0453  | 0.0262  | 0.0555  | 0.0272  | 0.0491  |
| 3             | C    | -0.0418 | -0.1034 | -0.0599 | -0.1213 | -0.0389 | -0.0891 |
| 4             | C    | -0.0681 | -0.0973 | -0.058  | -0.0785 | -0.0562 | -0.0571 |
| 5             | C    | -0.4038 | -0.3487 | -0.3733 | -0.295  | -0.3055 | -0.1824 |
| 6             | C    | 0.2465  | 0.145   | 0.2597  | 0.128   | 0.2507  | 0.0866  |
| 7             | C    | -0.058  | -0.0383 | -0.0649 | -0.0445 | -0.041  | -0.0123 |
| 8             | C    | -0.4032 | -0.3101 | -0.3929 | -0.2776 | -0.3602 | -0.2294 |
| 9             | C    | 0.2075  | 0.1208  | 0.2151  | 0.103   | 0.2287  | 0.1141  |
| 10            | C    | 0.0116  | 0.0492  | 0.0262  | 0.0698  | 0.0272  | 0.0449  |
| 11            | C    | -0.0518 | -0.0928 | -0.0582 | -0.0928 | -0.0623 | -0.0632 |
| 12            | C    | -0.0046 | 0.1963  | -0.0026 | 0.1925  | 0.0213  | 0.1877  |
| 13            | C    | 0.0564  | 0.0679  | 0.051   | 0.0539  | 0.0557  | 0.0449  |
| 14            | C    | -0.0681 | -0.1002 | -0.058  | -0.085  | -0.0562 | -0.0605 |
| 15            | C    | -0.058  | -0.0478 | -0.0649 | -0.0581 | -0.041  | -0.0065 |
| 16            | C    | 0.2465  | 0.1473  | 0.2597  | 0.1394  | 0.2507  | 0.0871  |
| 17            | C    | -0.4032 | -0.317  | -0.3929 | -0.2799 | -0.3602 | -0.2255 |
| 18            | C    | 0.2075  | 0.1328  | 0.2151  | 0.1085  | 0.2287  | 0.1048  |
| 19            | C    | -0.4038 | -0.3448 | -0.3733 | -0.3061 | -0.3056 | -0.1886 |
| 20            | C    | 0.195   | 0.1403  | 0.1884  | 0.1306  | 0.1736  | 0.0712  |
| 21            | C    | -0.2279 | -0.2405 | -0.2015 | -0.2159 | -0.1615 | -0.1483 |
| 22            | C    | 0.1086  | 0.0061  | 0.1324  | 0.0306  | 0.1735  | 0.0965  |
| 23            | C    | -0.2158 | -0.1716 | -0.2097 | -0.1605 | -0.2077 | -0.1821 |
| 24            | C    | -0.2279 | -0.2436 | -0.2015 | -0.2151 | -0.1615 | -0.1467 |
| 25            | C    | -0.2158 | -0.1724 | -0.2097 | -0.1646 | -0.2077 | -0.1824 |
| 26            | C    | -0.0051 | 0.1736  | 0.0485  | 0.2325  | 0.0387  | 0.2031  |
| 27            | C    | -0.0418 | -0.1014 | -0.0599 | -0.118  | -0.0389 | -0.0901 |
| 28            | C    | -0.0046 | 0.1898  | -0.0026 | 0.1763  | 0.0213  | 0.1895  |
| 29            | C    | -0.0518 | -0.0877 | -0.0582 | -0.0723 | -0.0623 | -0.0676 |
| 30            | C    | 0.195   | 0.144   | 0.1884  | 0.1218  | 0.1736  | 0.0677  |
| 31            | H    | 0.1475  | 0.15    | 0.1597  | 0.1573  | 0.1683  | 0.1638  |
| 32            | H    | 0.1506  | 0.1464  | 0.1638  | 0.154   | 0.1775  | 0.1648  |
| 33            | H    | 0.1475  | 0.1506  | 0.1597  | 0.16    | 0.1683  | 0.166   |
| 34            | H    | 0.1247  | 0.1429  | 0.1368  | 0.1532  | 0.1516  | 0.1639  |
| 35            | H    | 0.1246  | 0.1356  | 0.1395  | 0.1482  | 0.1579  | 0.1678  |
| 36            | H    | 0.1246  | 0.1357  | 0.1395  | 0.1464  | 0.1579  | 0.1688  |
| 37            | H    | 0.1247  | 0.1433  | 0.1368  | 0.1525  | 0.1516  | 0.163   |
| 38            | C    | -0.2478 | -0.2384 | -0.2213 | -0.1963 | -0.2276 | -0.2039 |
| 39            | C    | -0.2478 | -0.2348 | -0.2213 | -0.1952 | -0.2276 | -0.2076 |
| 40            | C    | -0.3554 | -0.2487 | -0.3327 | -0.2068 | -0.3097 | -0.1742 |
| 41            | C    | 0.1201  | 0.0535  | 0.1469  | 0.0553  | 0.1394  | 0.0412  |
| 42            | C    | -0.1598 | -0.1646 | -0.1752 | -0.1743 | -0.1499 | -0.1387 |
| 43            | C    | -0.3573 | -0.2843 | -0.2902 | -0.1938 | -0.2597 | -0.143  |
| 44            | C    | 0.191   | 0.07    | 0.1869  | 0.0431  | 0.1949  | 0.0272  |
| 45            | C    | 0.0443  | 0.007   | 0.0706  | 0.0488  | 0.0657  | 0.0436  |
| 46            | C    | -0.2055 | -0.2179 | -0.1674 | -0.1679 | -0.147  | -0.138  |
| 47            | C    | 0.1468  | 0.0872  | 0.1281  | 0.0494  | 0.127   | 0.0255  |
| 48            | C    | 0.0843  | 0.0878  | 0.0862  | 0.0993  | 0.0796  | 0.1114  |
| 49            | C    | -0.1327 | -0.0601 | -0.1439 | -0.072  | -0.1192 | -0.0587 |
| 50            | C    | -0.2424 | -0.2117 | -0.2438 | -0.2063 | -0.2411 | -0.2026 |
| 51            | C    | 0.076   | 0.081   | 0.0896  | 0.1034  | 0.1155  | 0.1305  |
| 52            | C    | -0.2327 | -0.295  | -0.2508 | -0.324  | -0.2677 | -0.3485 |
| 53            | C    | 0.1131  | 0.1137  | 0.1452  | 0.1419  | 0.1243  | 0.1161  |
| 54            | C    | 0.1735  | 0.0778  | 0.2262  | 0.1199  | 0.2663  | 0.1439  |
| 55            | C    | -0.0901 | -0.0507 | -0.1028 | -0.06   | -0.1343 | -0.0746 |
| 56            | B    | 0.1784  | 0.3174  | 0.2895  | 0.4598  | 0.3206  | 0.4865  |
| 57            | C    | -0.2198 | -0.3208 | -0.2751 | -0.379  | -0.2293 | -0.3136 |

Continued on next page



Table 20 – continued from previous page

| Index | Atom | RESP    | MBIS    | RESP    | MBIS    | RESP    | MBIS    |
|-------|------|---------|---------|---------|---------|---------|---------|
| 58    | C    | -0.2424 | -0.2085 | -0.2438 | -0.2102 | -0.2411 | -0.2015 |
| 59    | C    | 0.076   | 0.0854  | 0.0896  | 0.1113  | 0.1155  | 0.1234  |
| 60    | C    | -0.2327 | -0.2988 | -0.2508 | -0.3303 | -0.2677 | -0.3482 |
| 61    | C    | 0.1131  | 0.1182  | 0.1452  | 0.1436  | 0.1243  | 0.1192  |
| 62    | C    | -0.2055 | -0.2184 | -0.1674 | -0.1622 | -0.147  | -0.1414 |
| 63    | C    | 0.1468  | 0.0817  | 0.1281  | 0.0409  | 0.127   | 0.0358  |
| 64    | C    | 0.0844  | 0.088   | 0.0862  | 0.1084  | 0.0796  | 0.1104  |
| 65    | C    | -0.1327 | -0.0605 | -0.1439 | -0.079  | -0.1192 | -0.0582 |
| 66    | C    | -0.3573 | -0.2776 | -0.2902 | -0.1855 | -0.2597 | -0.1457 |
| 67    | C    | 0.191   | 0.0658  | 0.1869  | 0.0357  | 0.1949  | 0.0276  |
| 68    | C    | 0.0443  | 0.0148  | 0.0706  | 0.0571  | 0.0657  | 0.042   |
| 69    | C    | 0.1201  | 0.0491  | 0.1469  | 0.0507  | 0.1393  | 0.0428  |
| 70    | C    | -0.3554 | -0.2521 | -0.3327 | -0.2006 | -0.3097 | -0.1754 |
| 71    | C    | -0.1598 | -0.1599 | -0.1752 | -0.1718 | -0.1499 | -0.1405 |
| 72    | H    | 0.1219  | 0.1401  | 0.1367  | 0.1509  | 0.1528  | 0.1643  |
| 73    | H    | 0.1106  | 0.1339  | 0.1292  | 0.1481  | 0.1441  | 0.1596  |
| 74    | H    | 0.1506  | 0.1448  | 0.1638  | 0.1535  | 0.1775  | 0.1657  |
| 75    | H    | 0.1106  | 0.1344  | 0.1292  | 0.1489  | 0.1441  | 0.1594  |
| 76    | H    | 0.1219  | 0.1401  | 0.1367  | 0.1508  | 0.1528  | 0.1639  |
| 77    | H    | 0.1421  | 0.1328  | 0.157   | 0.1466  | 0.1686  | 0.1554  |
| 78    | H    | 0.1301  | 0.1318  | 0.1416  | 0.1432  | 0.1522  | 0.1515  |
| 79    | H    | 0.1421  | 0.135   | 0.157   | 0.1451  | 0.1686  | 0.1564  |
| 80    | H    | 0.1301  | 0.1309  | 0.1416  | 0.1417  | 0.1522  | 0.1507  |
| 81    | H    | 0.1137  | 0.1319  | 0.1299  | 0.1447  | 0.1435  | 0.156   |
| 82    | H    | 0.1176  | 0.1311  | 0.1372  | 0.1488  | 0.152   | 0.16    |
| 83    | H    | 0.1137  | 0.1316  | 0.1299  | 0.1458  | 0.1435  | 0.1562  |
| 84    | H    | 0.1176  | 0.1314  | 0.1372  | 0.1483  | 0.152   | 0.1605  |
